# Supplementary material for: Exploring the sloped-to-peaked S2/S1 seam of intersection of thymine with electronic structure and direct quantum dynamics calculations
Source: Royal Society of Chemistry journal article supplement (doi:10.1039/c001556c), 2010-01-01
Supplement: c001556c.pdf [file c001556c.pdf]

## Exploring the sloped-to-peaked $S_2/S_1$ seam of intersection of thymine with static and quantum dynamical DD-vMCG calculations

David Asturiol<sup>a</sup>, Benjamin Lasorne<sup>b,c</sup>, Graham A. Worth,<sup>d</sup> Michael A. Robb<sup>c</sup>, Lluís

Blancafort<sup>a\*</sup>

### SUPPORTING INFORMATION

#### Run 1b

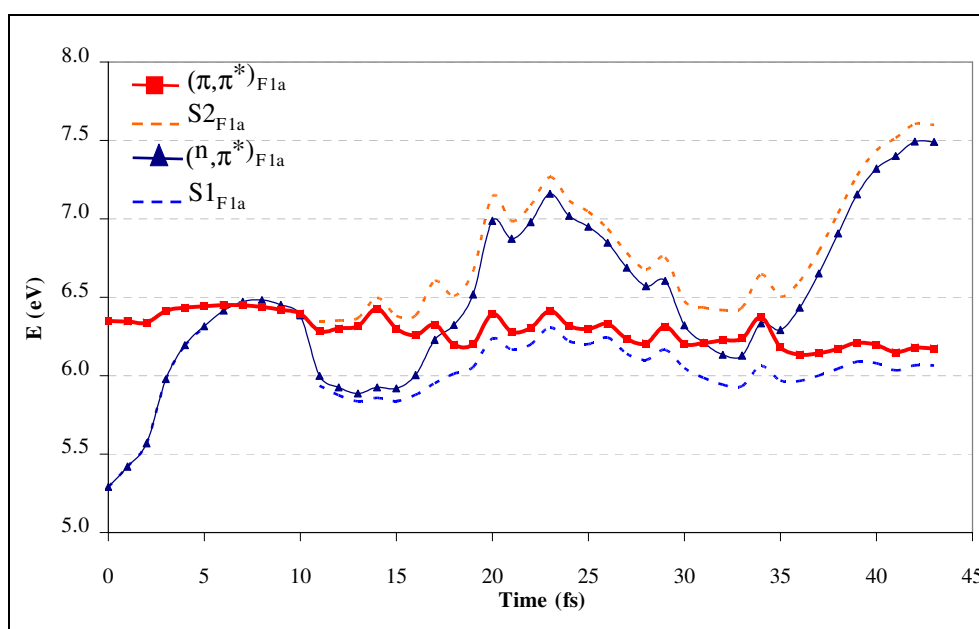

Figure SI-1a. Diabatic and adiabatic energies of the F1a function of run 1b.

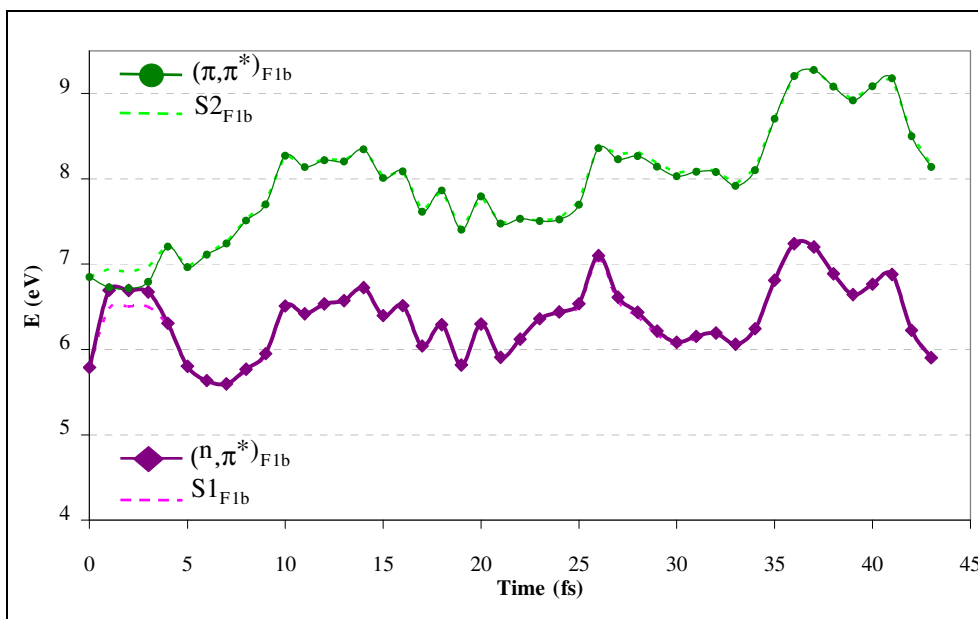

**Figure SI-1b.** Diabatic and adiabatic energies of the F1b function of run 1b.

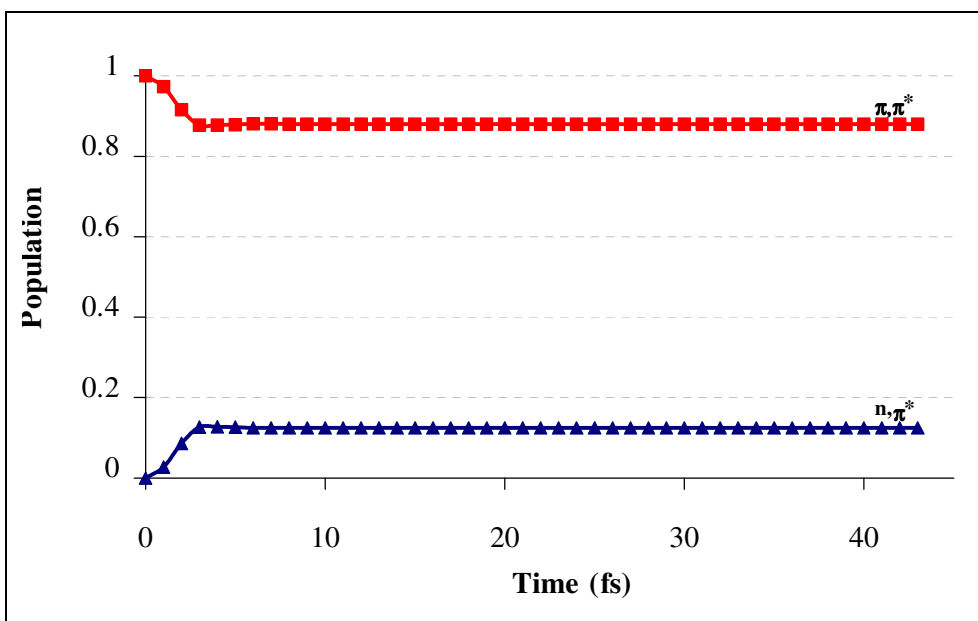

**Figure SI-2.** Quasi-diabatic populations of the  $(\pi, \pi^*)$  and  $(n, \pi^*)$  states of run 1b.

## Run 1c

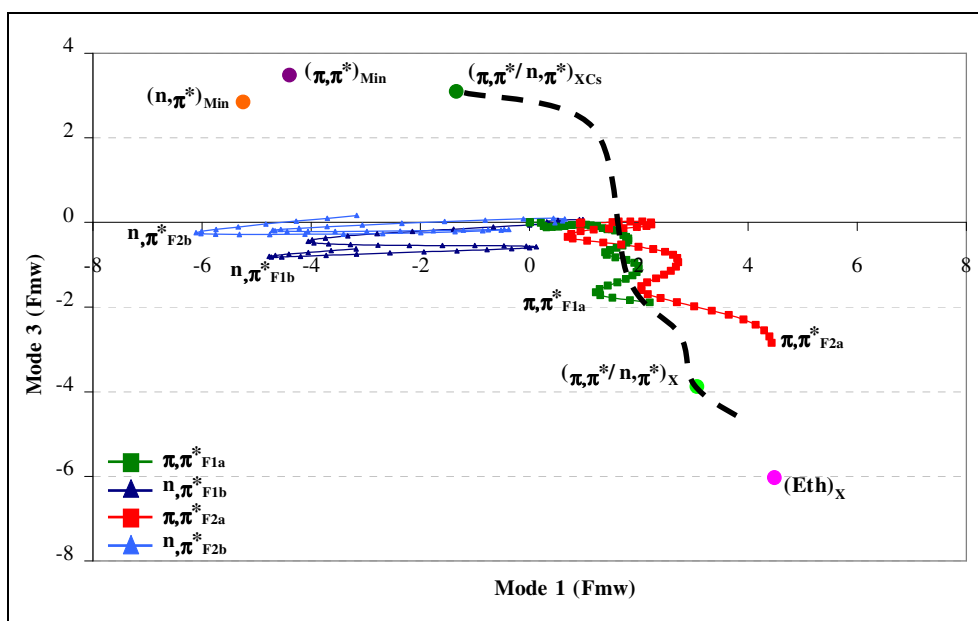

**Figure SI-3.** Position of the center of the Gaussian functions of run 1c (position relative to  $(\pi, \pi^*)_{TS}$ ).

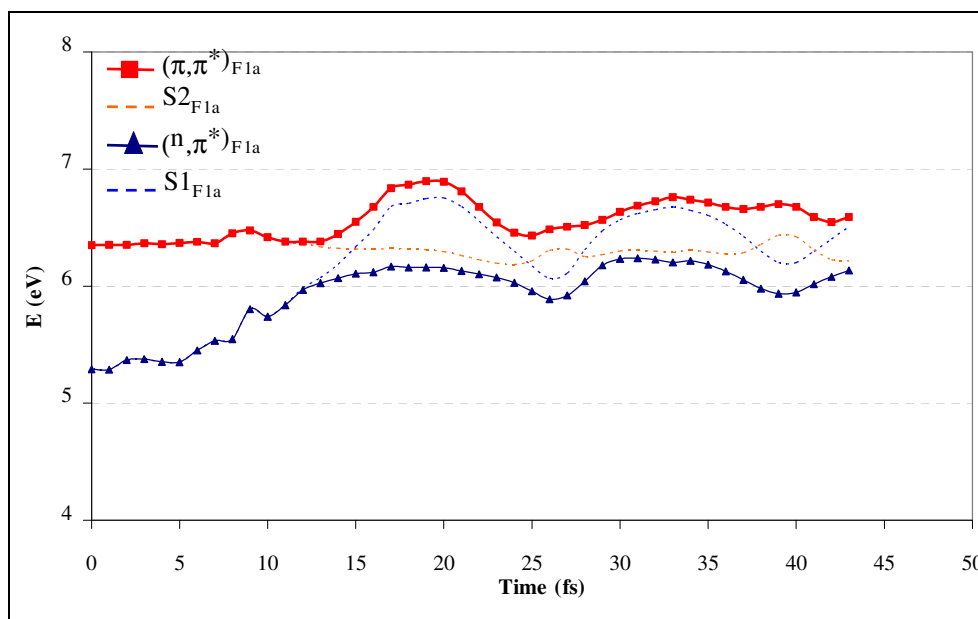

**Figure SI-4a.** Diabatic and adiabatic energies at the center of function F1a of run 1c.

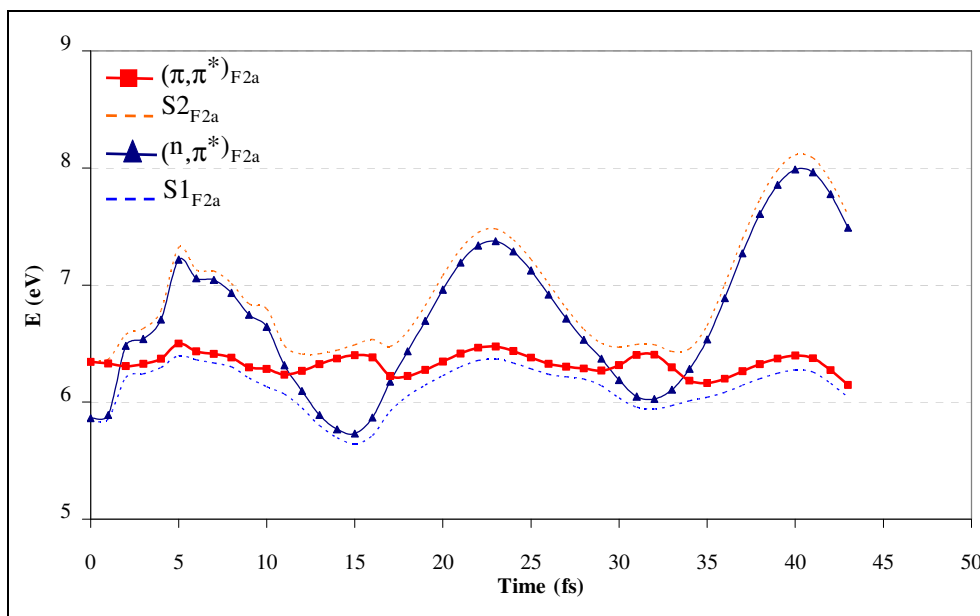

**Figure SI-4b.** Diabatic and adiabatic energies at the center of function F2a of run 1c.

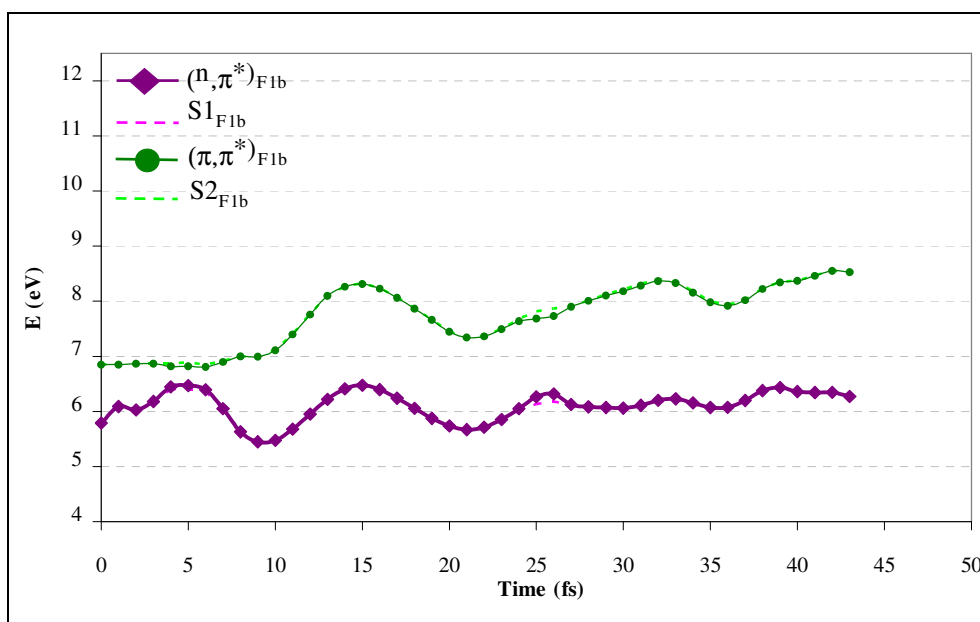

**Figure SI-4c.** Diabatic and adiabatic energies at the center of function F1b of run 1c.

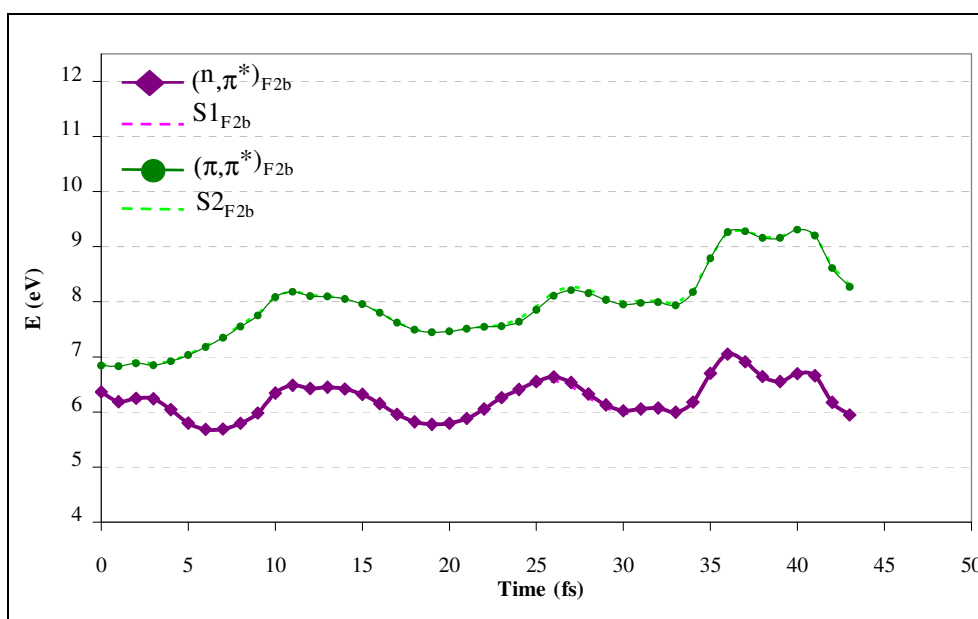

**Figure SI-4d.** Diabatic and adiabatic energies at the center of function F2b of run 1c.

## Run 1d

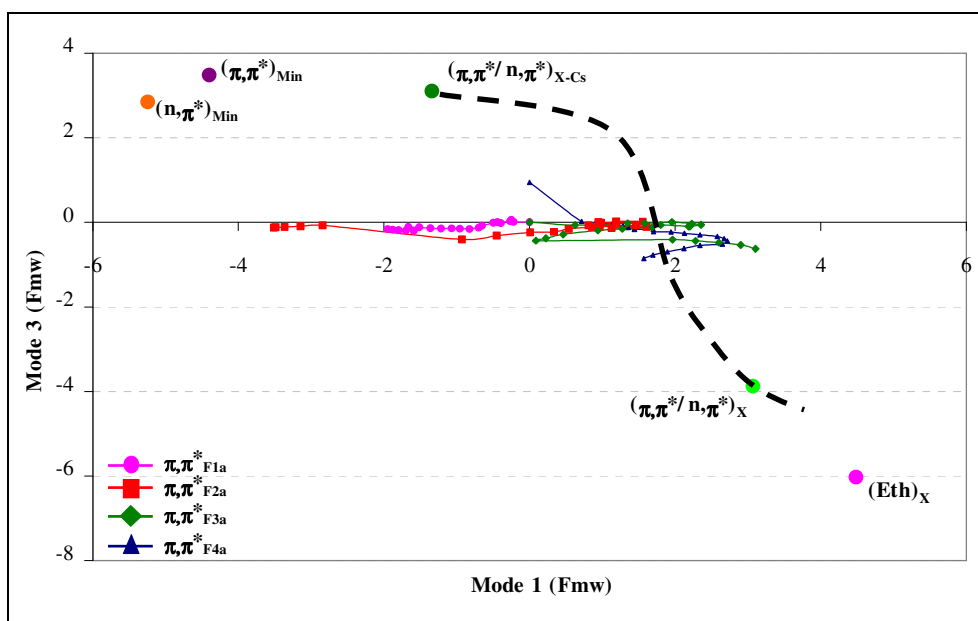

**Figure SI-5a.** Position of the center of the F1a-4a Gaussian functions of run 1d (position relative to  $(\pi, \pi^*)_{\text{TS}}$ ).

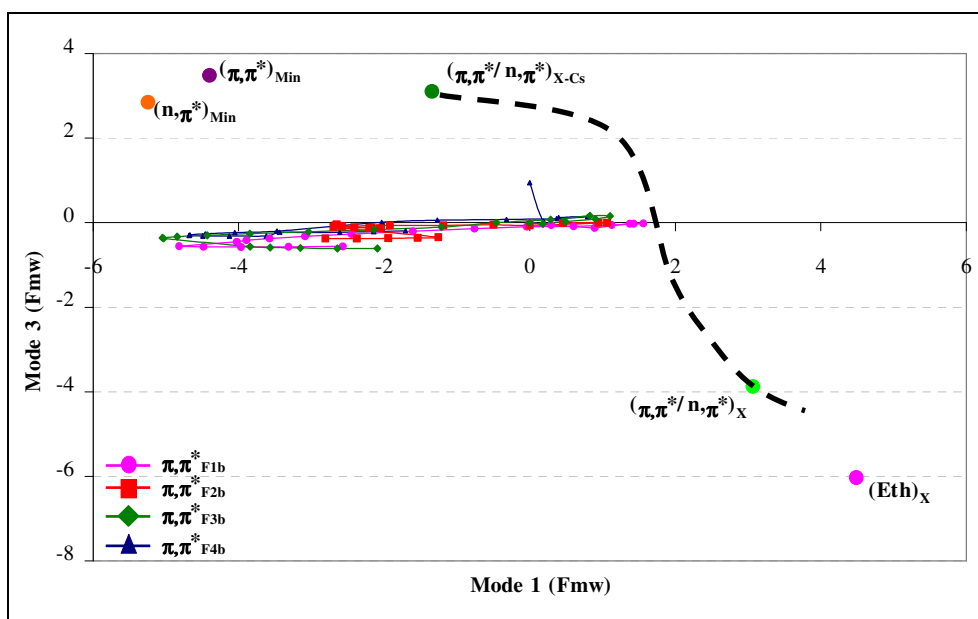

**Figure SI-5b.** Position of the center of the F1b-4b Gaussian functions of run 1d (position relative to  $(\pi, \pi^*)_{\text{TS}}$ ).

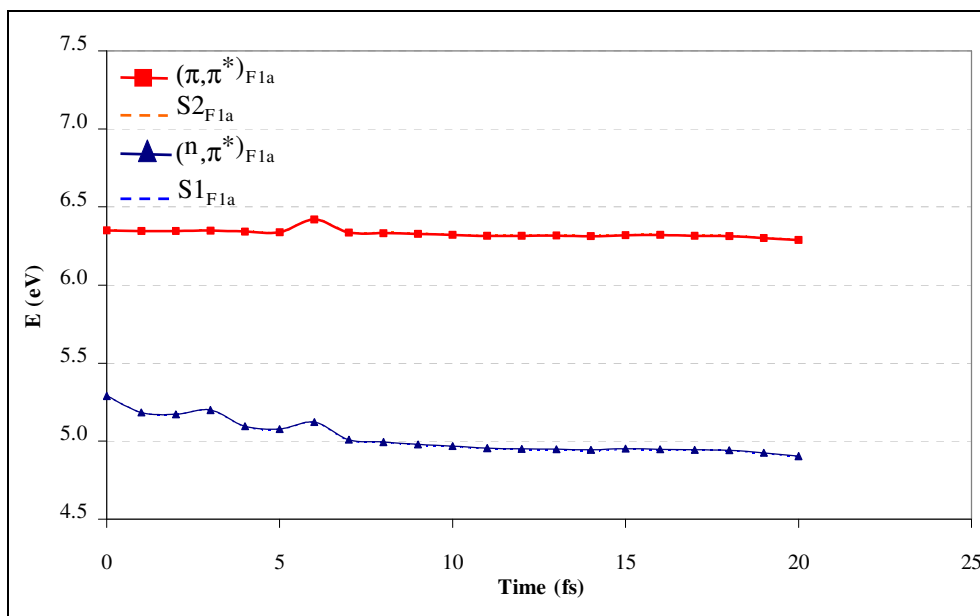

**Figure SI-6a.** Diabatic and adiabatic energies at the center of function F1a of run 1d.

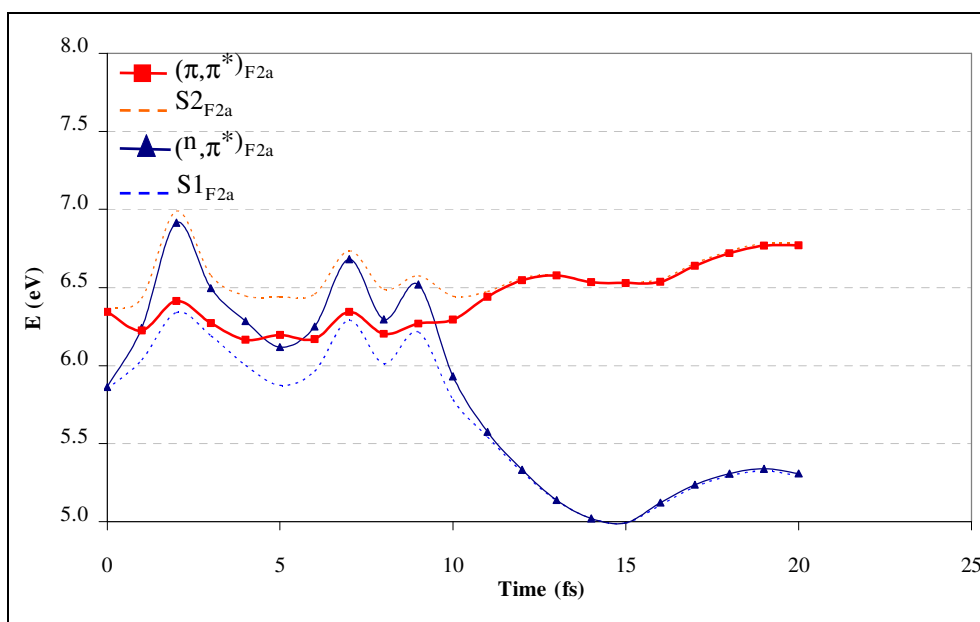

**Figure SI-6b.** Diabatic and adiabatic energies at the center of function F2a of run 1d.

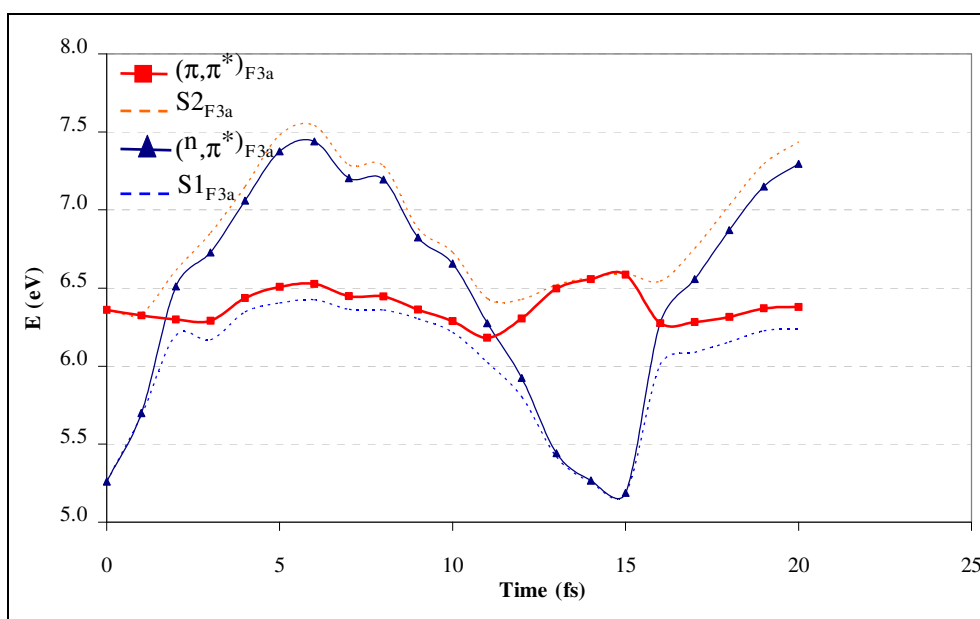

**Figure SI-6c.** Diabatic and adiabatic energies at the center of function F3a of run 1d.

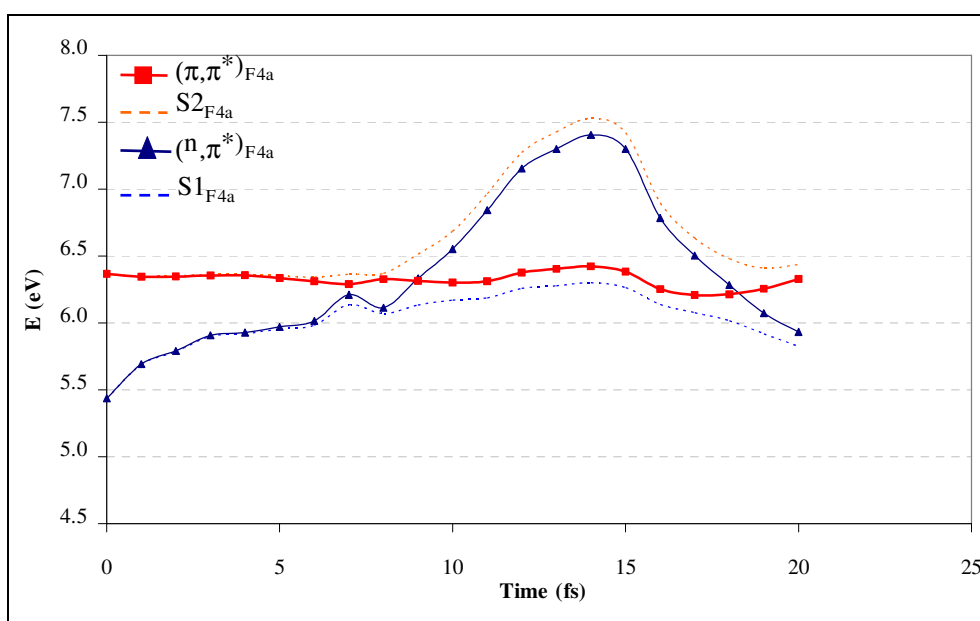

**Figure SI-6d.** Diabatic and adiabatic energies at the center of function F4a of run 1d.



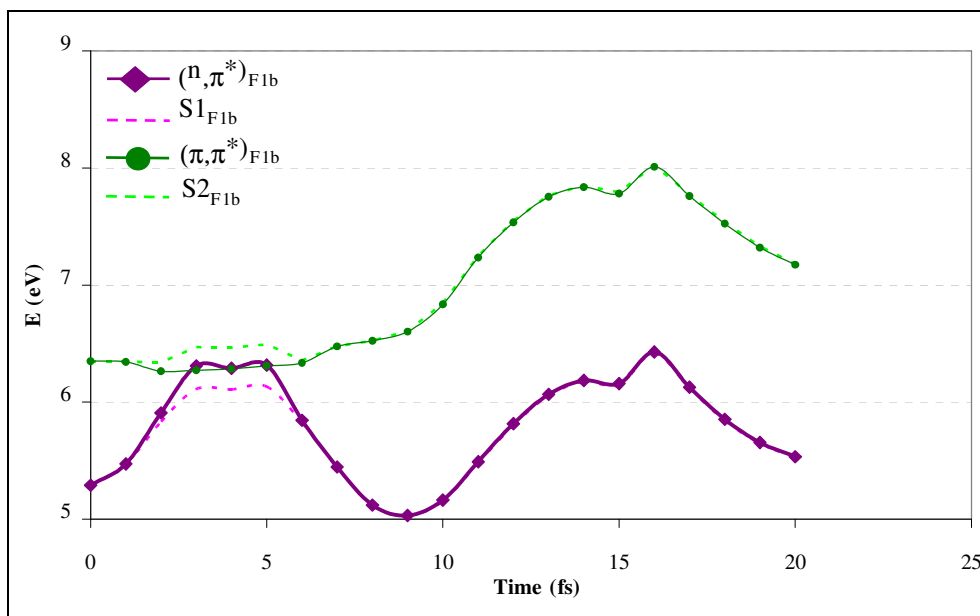

**Figure SI-6e.** Diabatic and adiabatic energies at the center of function F1b of run 1d.

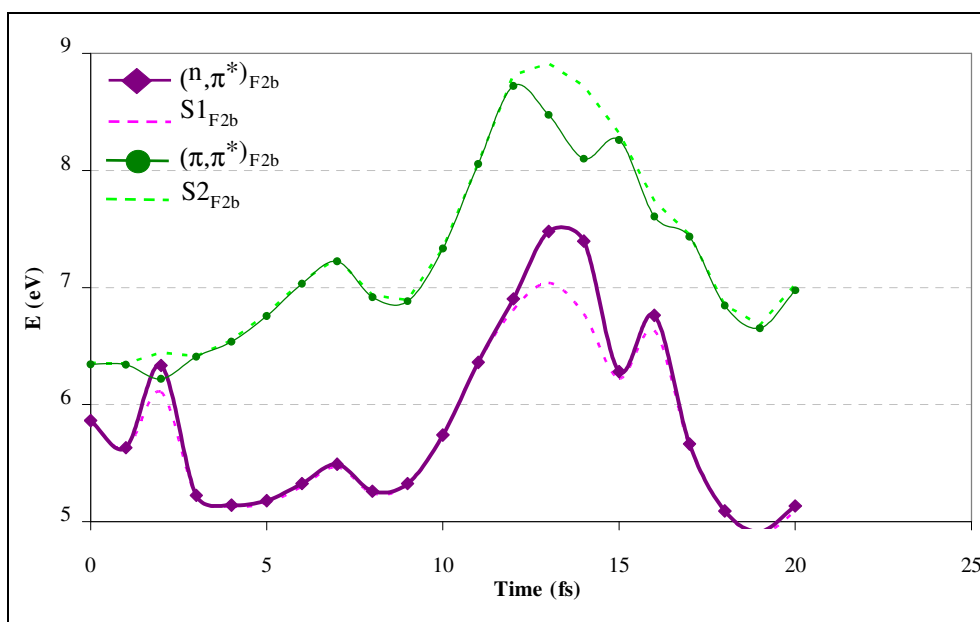

**Figure SI-6f.** Diabatic and adiabatic energies at the center of function F2b of run 1d.

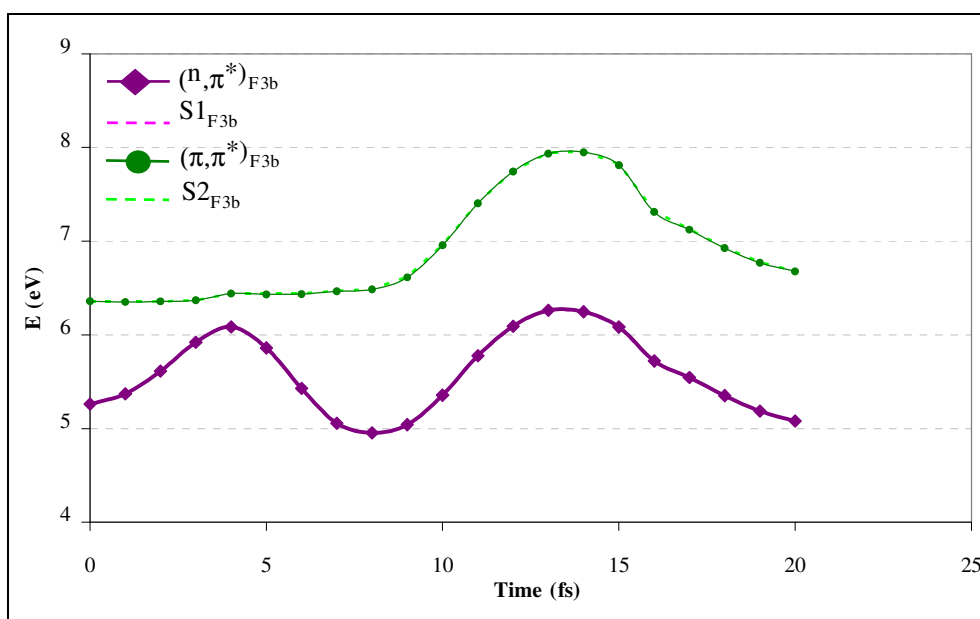

**Figure SI-6g.** Diabatic and adiabatic energies at the center of function F3b of run 1d.

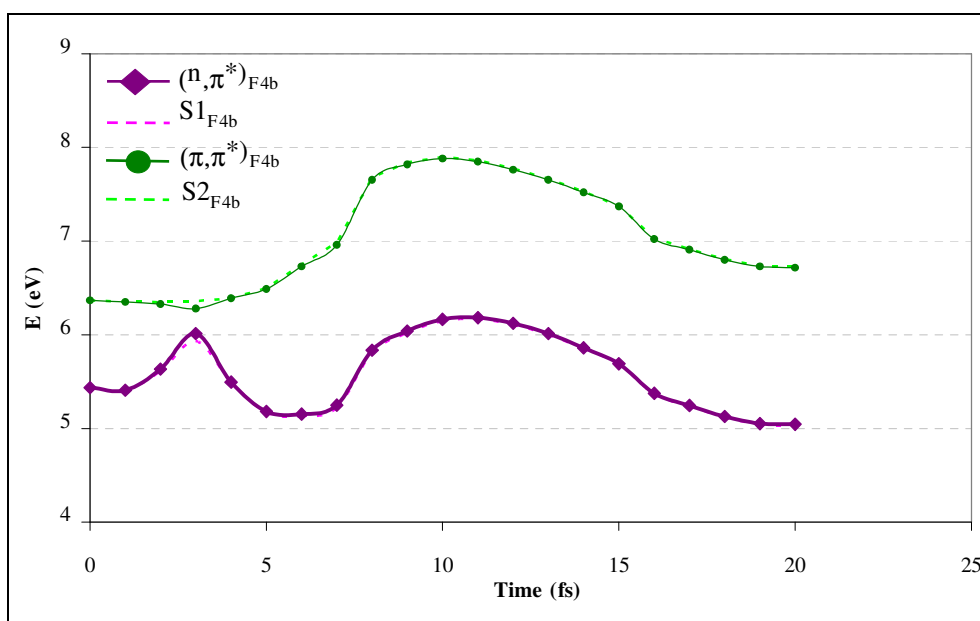

**Figure SI-6h.** Diabatic and adiabatic energies at the center of function F4b of run 1d.

## Run 1e

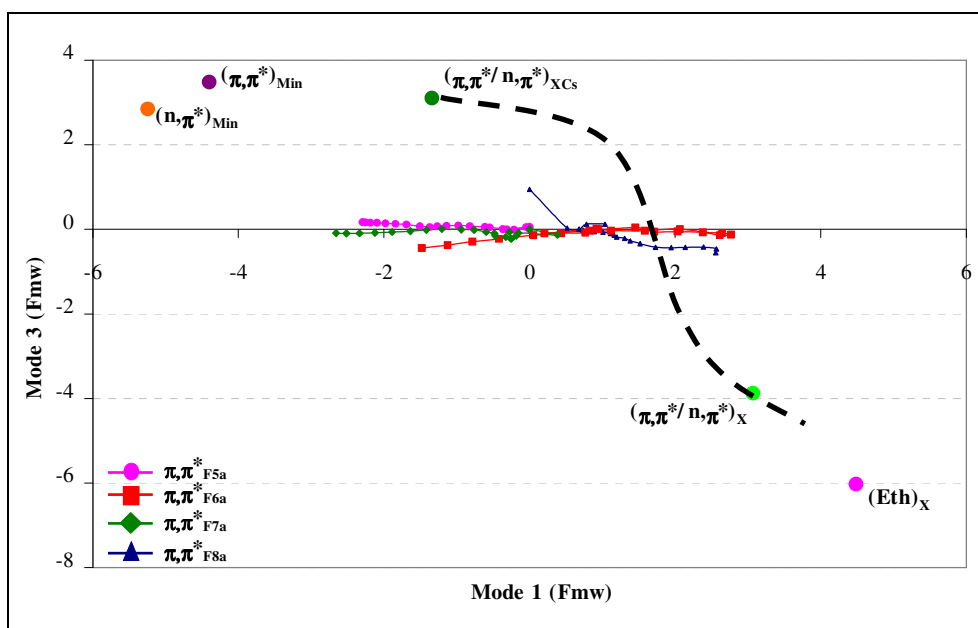

Figure SI-7a Position of the center of the F1a-F4a Gaussian functions of run 1e.

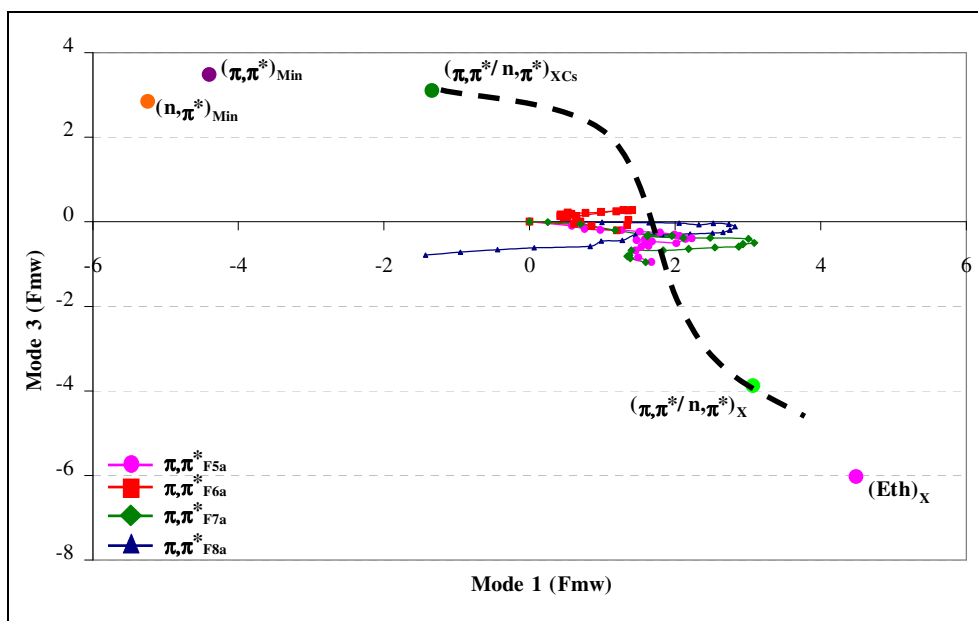

Figure SI-7b Position of the center of the F5a-F8a Gaussian functions of run 1e.

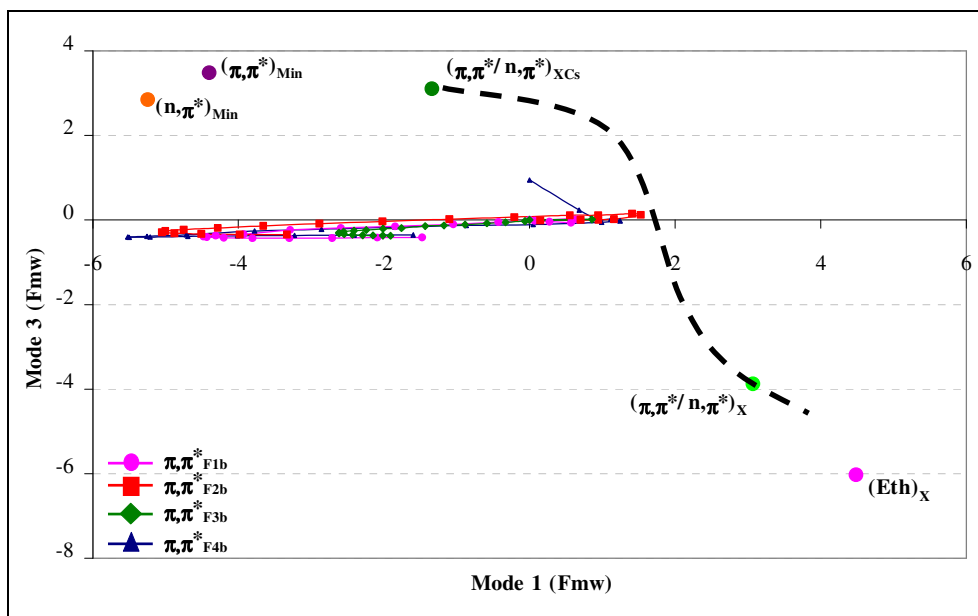

**Figure SI-7c** Position of the center of the F1b-F4b Gaussian functions of run 1e (positions relative to  $(\pi, \pi^*)_{\text{TS}}$ ).

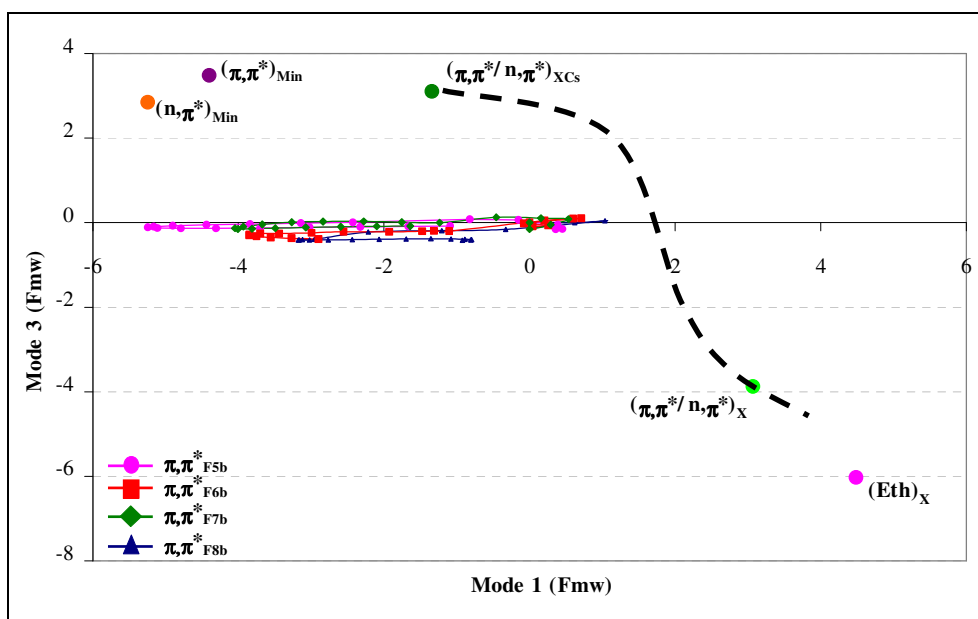

**Figure SI-7d** Position of the center of the F5b-F8b Gaussian functions of run 1e (positions relative to  $(\pi, \pi^*)_{\text{TS}}$ ).

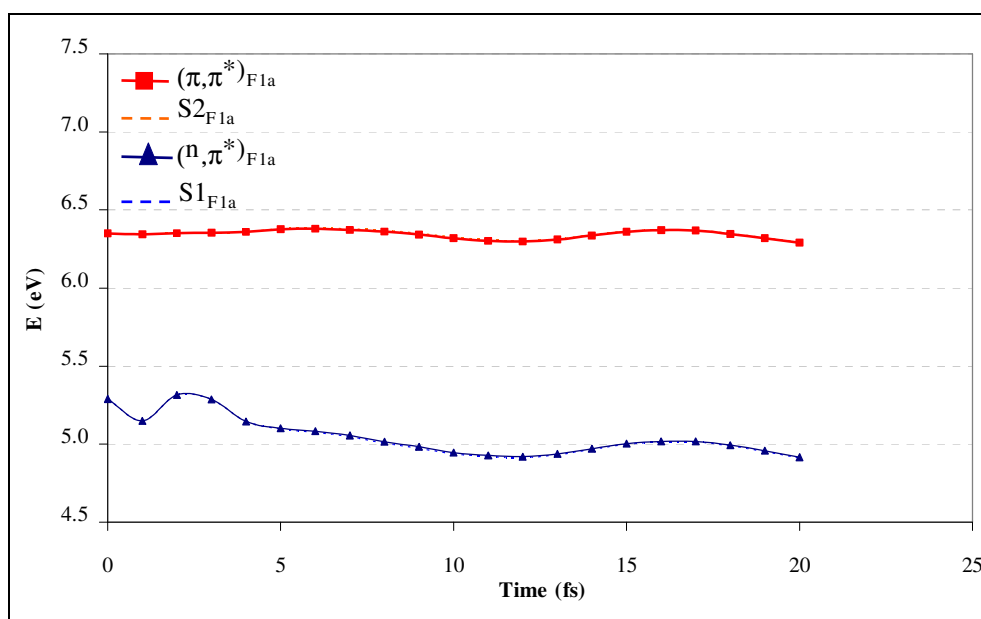

**Figure SI-8a.** Diabatic and adiabatic energies at the center of function F1a of run 1e.

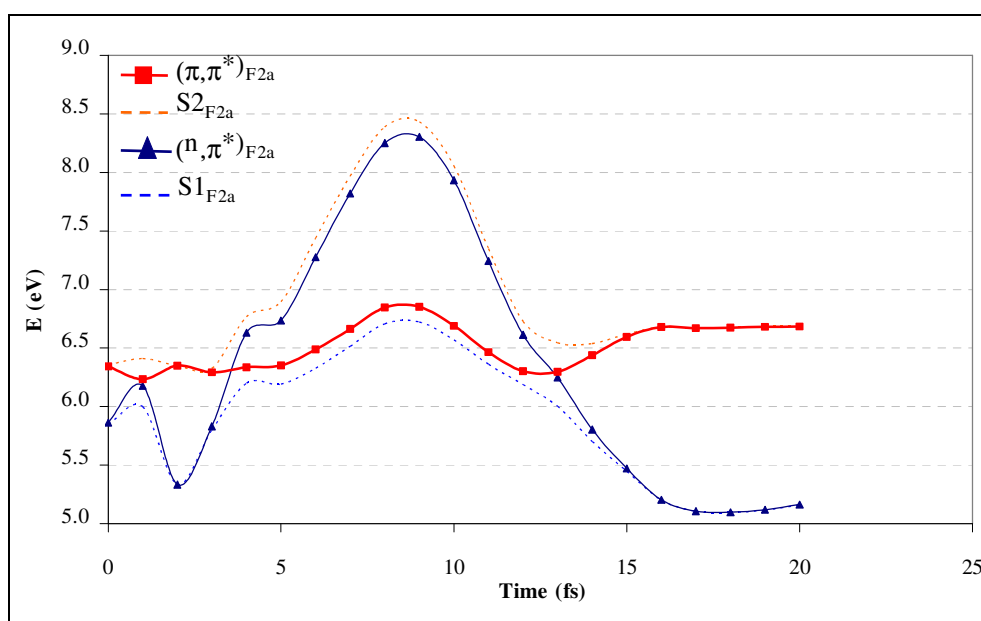

**Figure SI-8b.** Diabatic and adiabatic energies at the center of function F2a of run 1e.

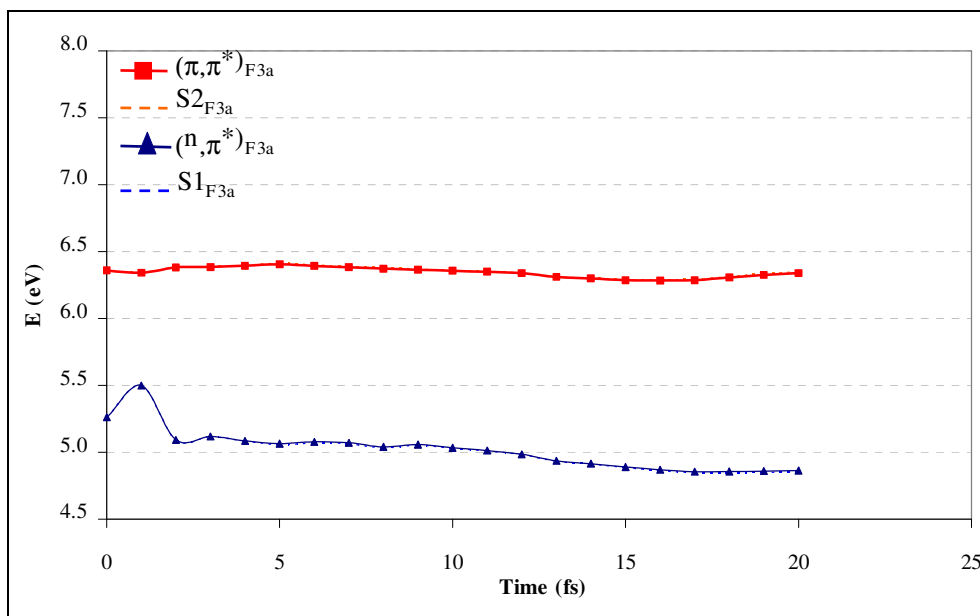

**Figure SI-8c.** Diabatic and adiabatic energies at the center of function F3a of run 1e.

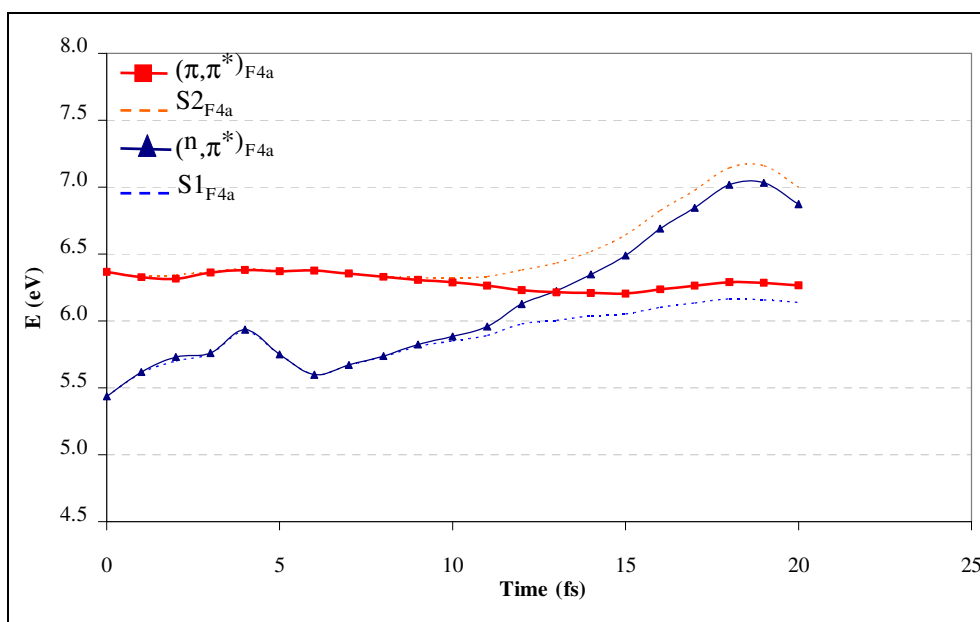

**Figure SI-8d.** Diabatic and adiabatic energies at the center of function F4a of run 1e.

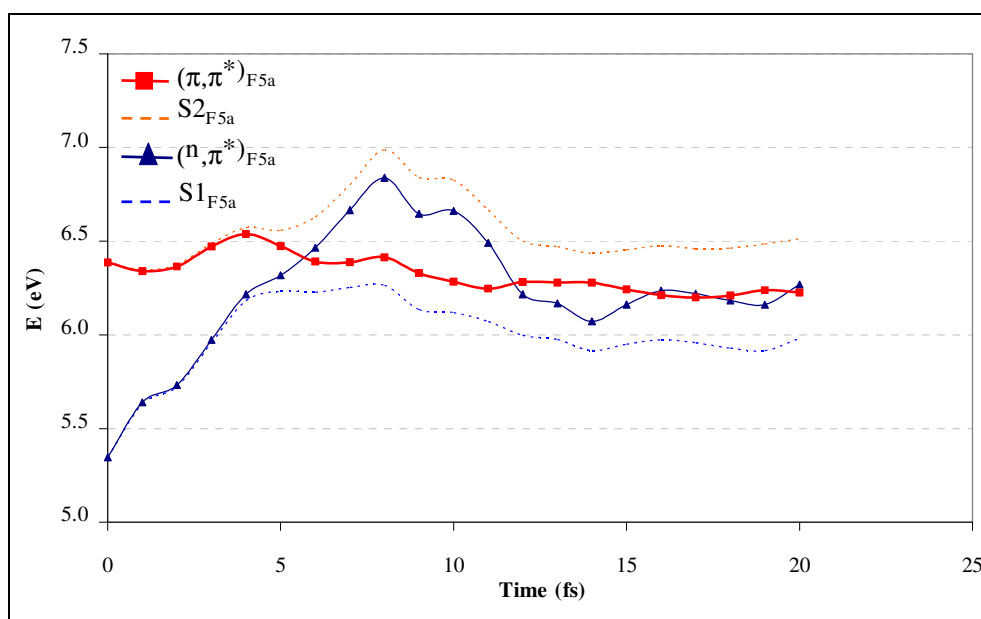

**Figure SI-8e.** Diabatic and adiabatic energies at the center of function F5a of run 1e.

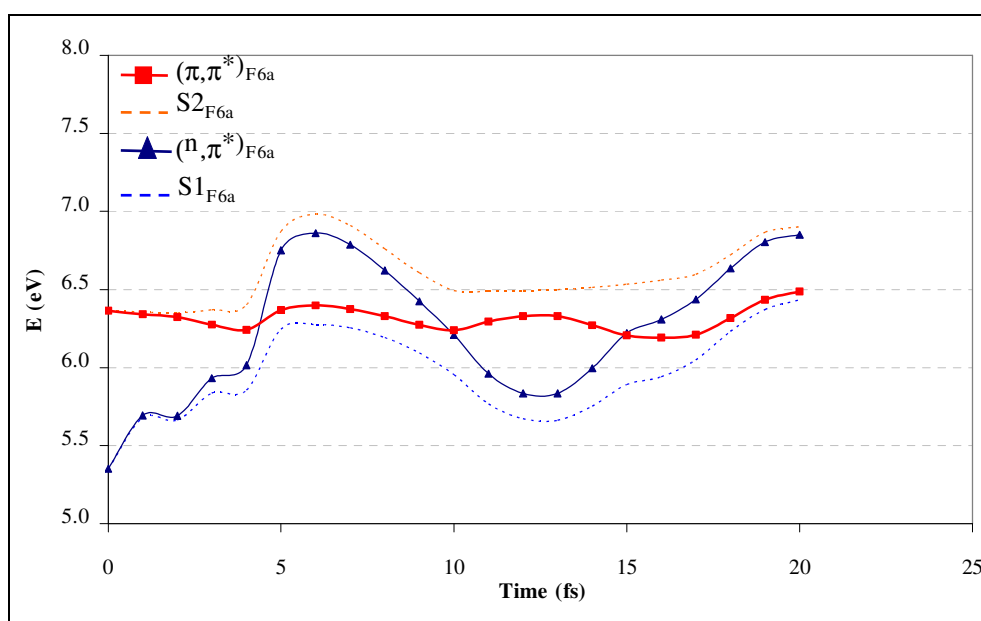

**Figure SI-8f.** Diabatic and adiabatic energies at the center of function F6a of run 1e.

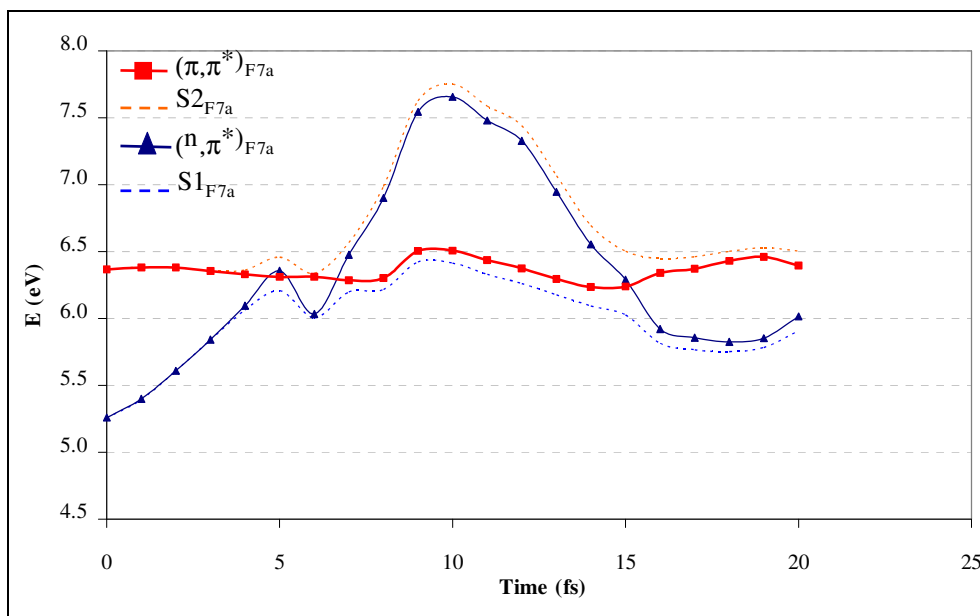

**Figure SI-8g.** Diabatic and adiabatic energies at the center of function F7a of run 1e.

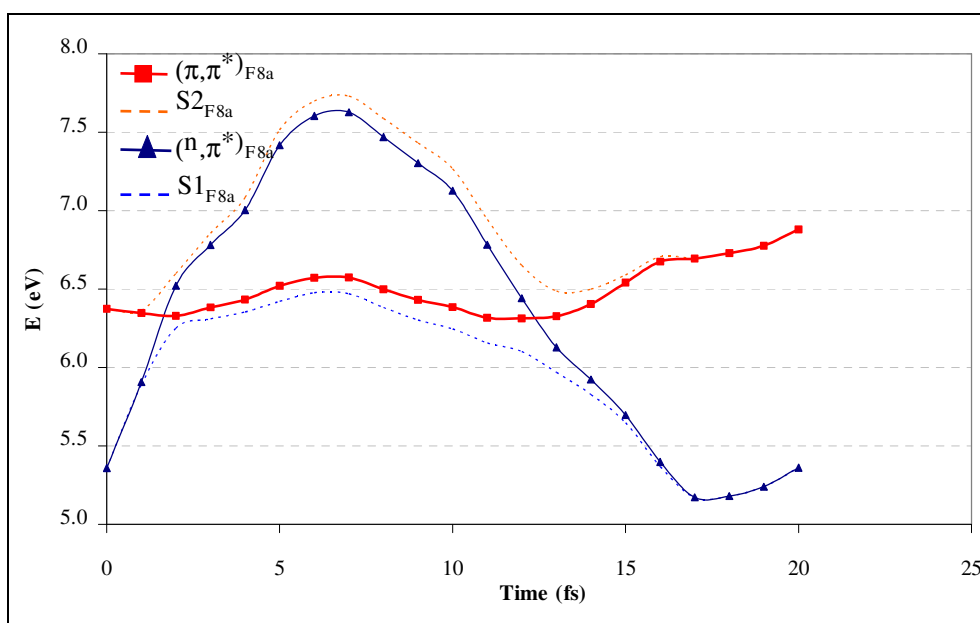

**Figure SI-8h.** Diabatic and adiabatic energies at the center of function F8a of run 1e.



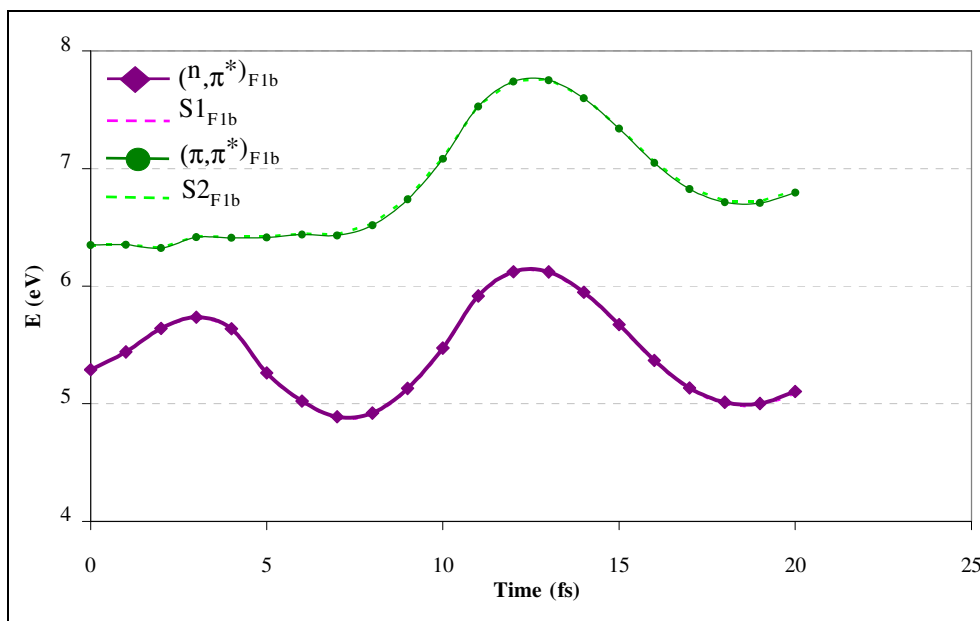

Figure SI-8i. Diabatic and adiabatic energies at the center of function F1b of run 1e.

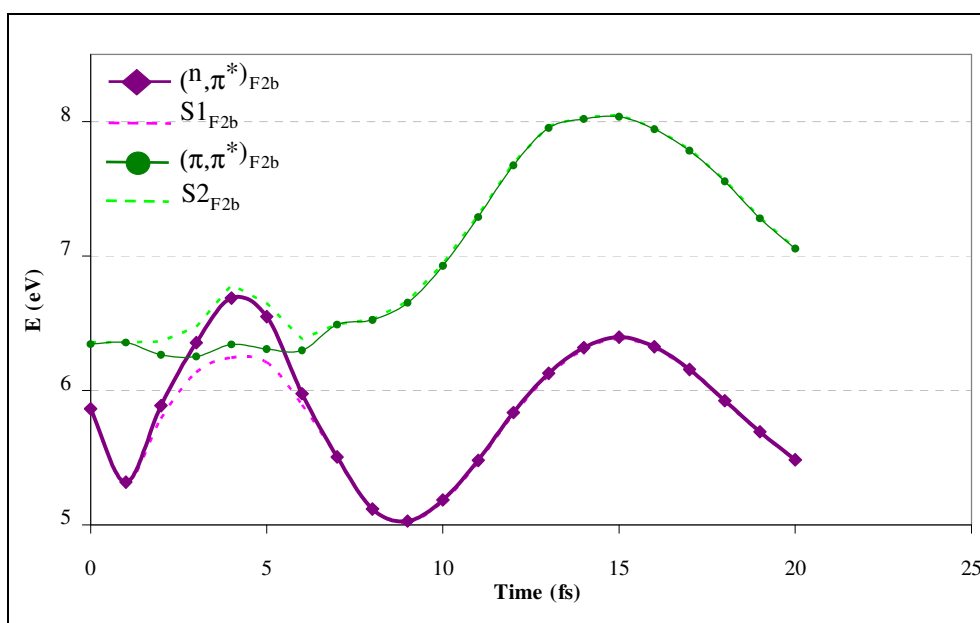

Figure SI-8j. Diabatic and adiabatic energies at the center of function F2b of run 1e.

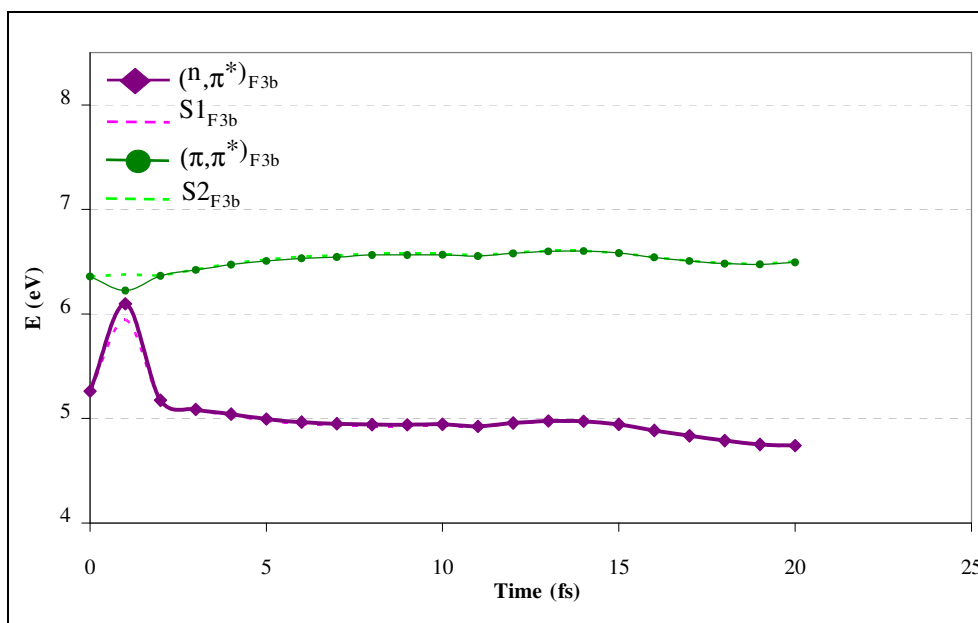

**Figure SI-8k.** Diabatic and adiabatic energies at the center of function F3b of run 1e.

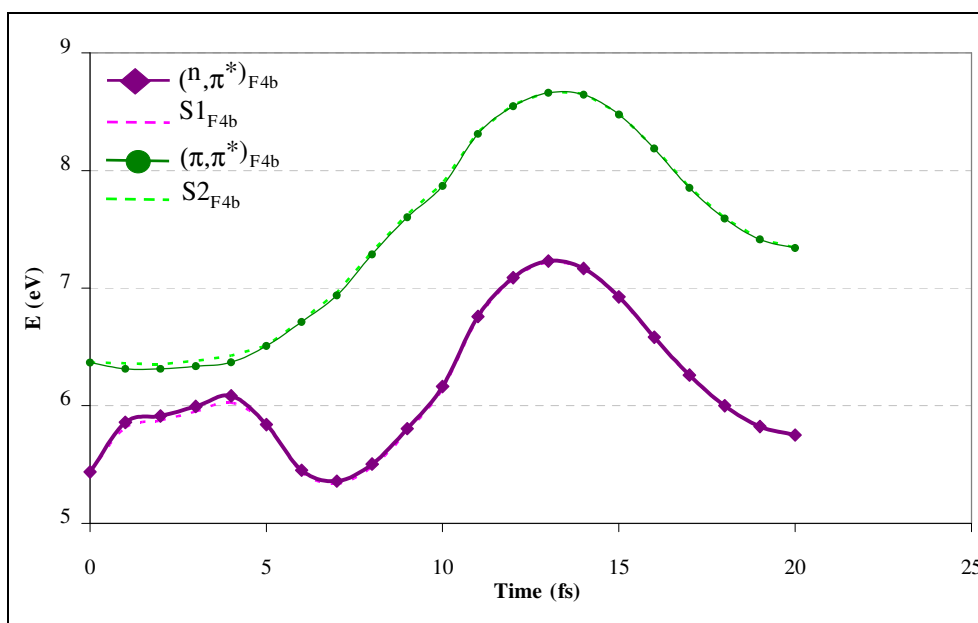

**Figure SI-8l.** Diabatic and adiabatic energies at the center of function F4b of run 1e.

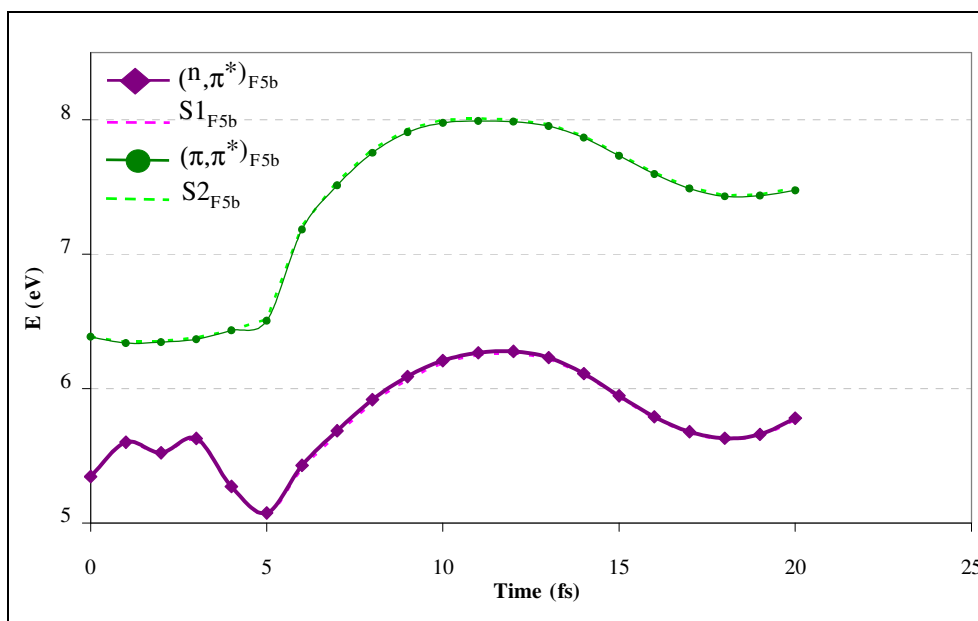

**Figure SI-8m.** Diabatic and adiabatic energies at the center of function F5b of run 1e.

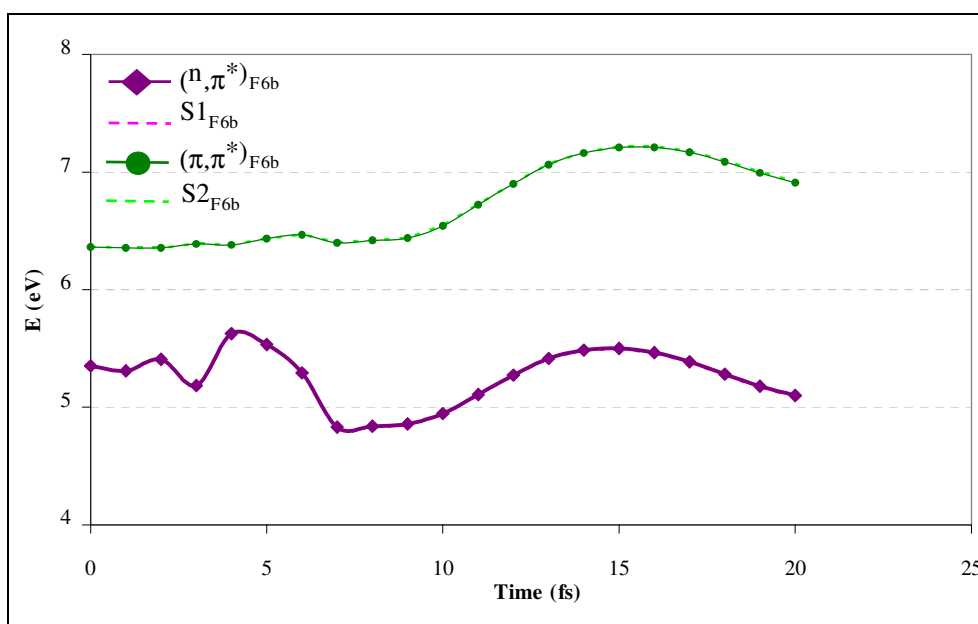

**Figure SI-8n.** Diabatic and adiabatic energies at the center of function F6b of run 1e.

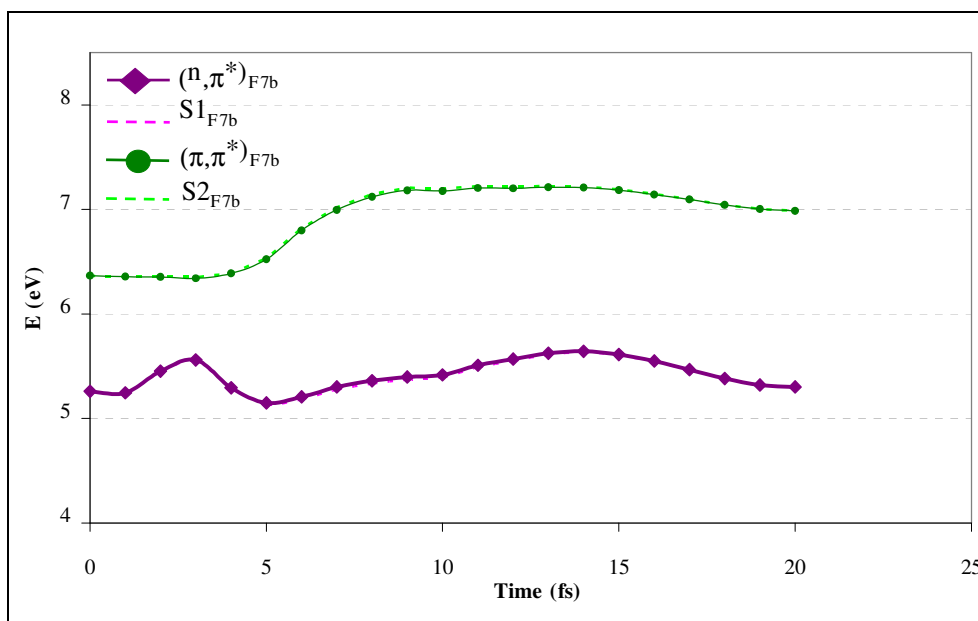

**Figure SI-8o.** Diabatic and adiabatic energies at the center of function F7b of run 1e.

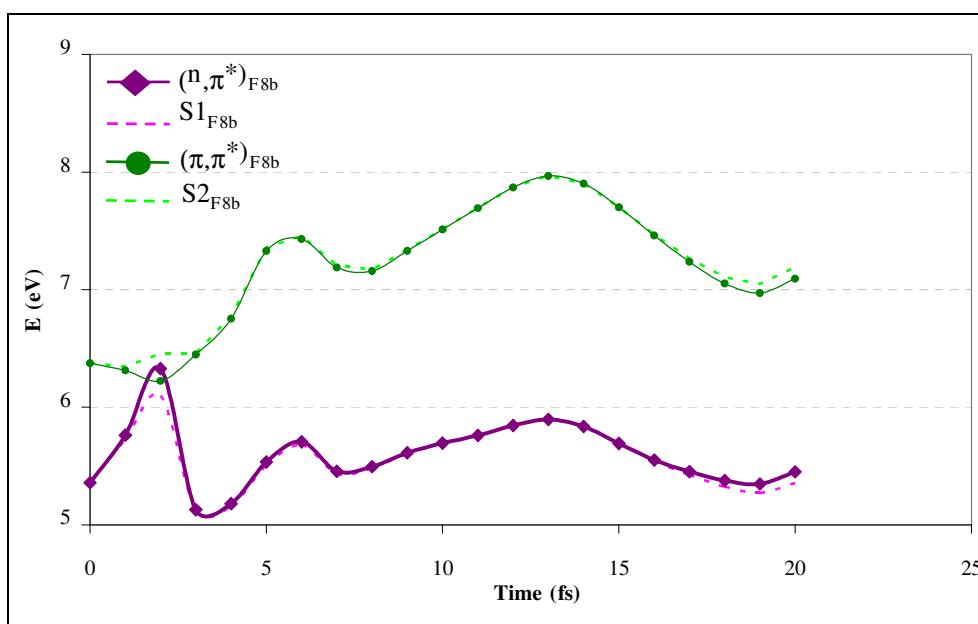

**Figure SI-8p.** Diabatic and adiabatic energies at the center of function F8b of run 1e.

## Run 2a

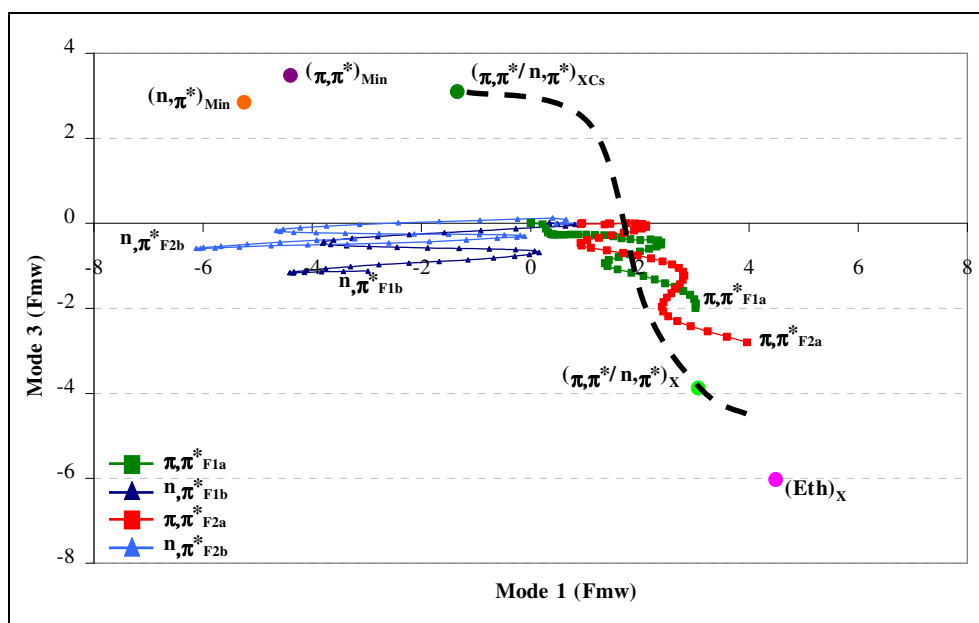

Figure SI-9 Position of the center of the Gaussian functions of run 2a.

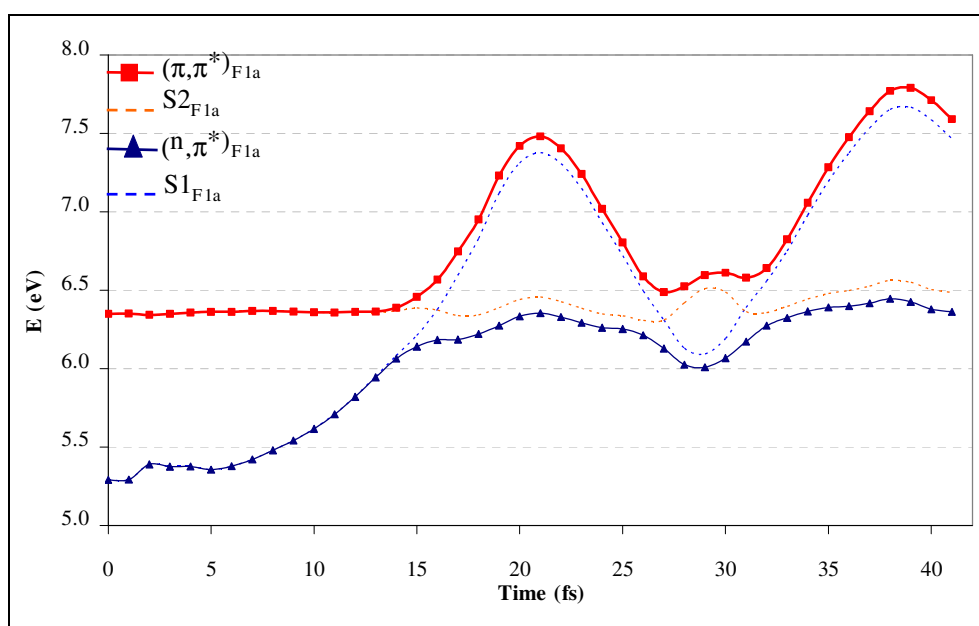

Figure SI-10a. Diabatic and adiabatic energies at the center of function F1a of run 2a.

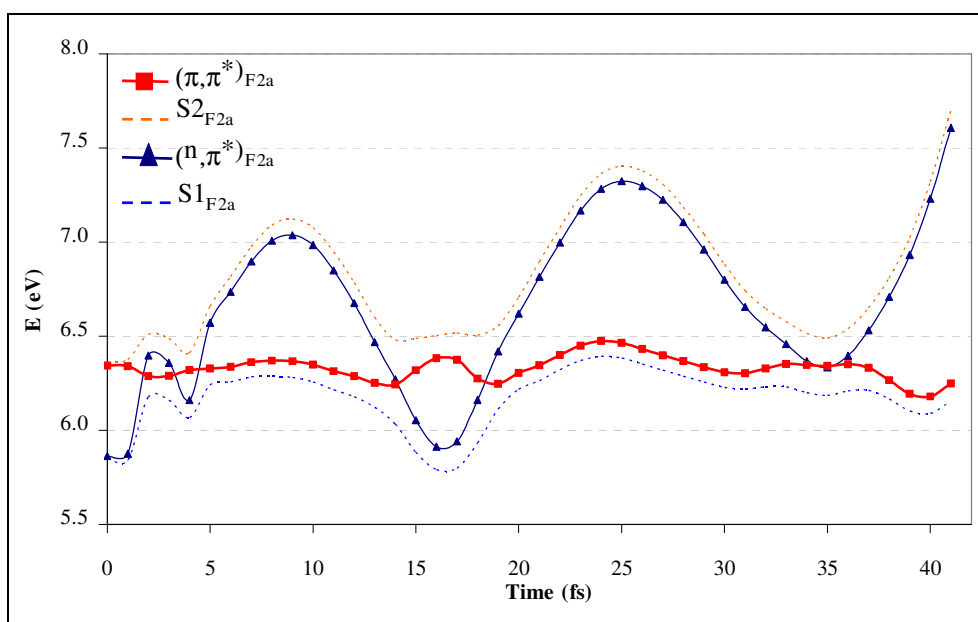

**Figure SI-10b.** Diabatic and adiabatic energies at the center of function F2a of run 2a.

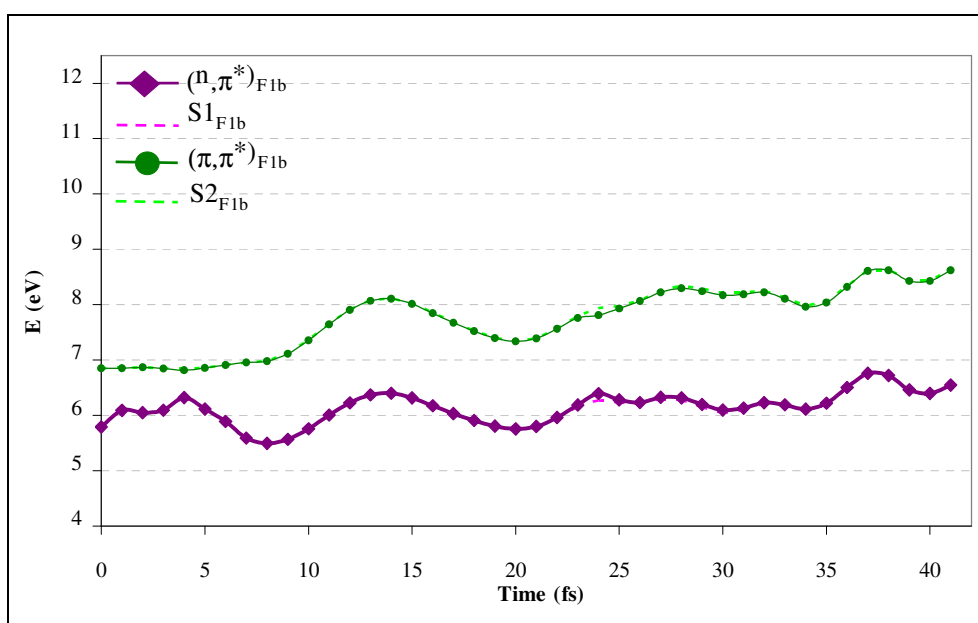

**Figure SI-10c.** Diabatic and adiabatic energies at the center of function F1b of run 2a.

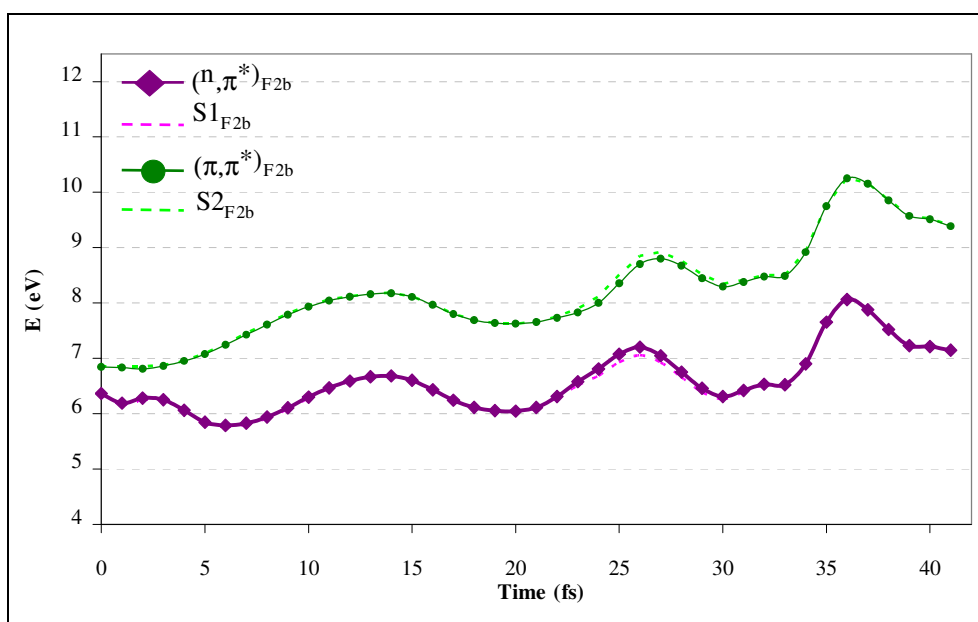

**Figure SI-10d.** Diabatic and adiabatic energies at the center of function F2b of run 2a.

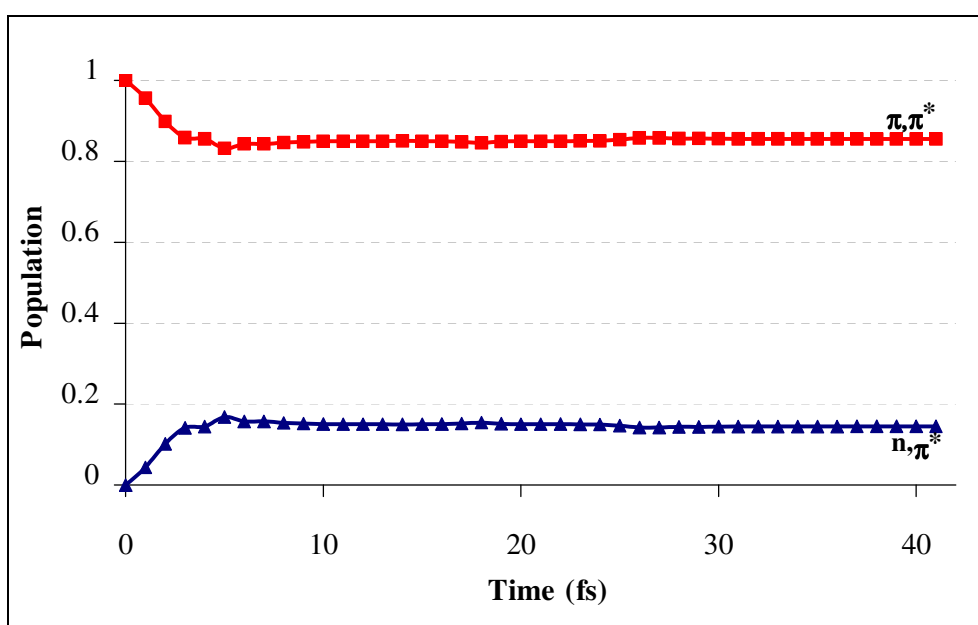

**Figure SI-11.** Populations of the  $\pi, \pi^*$  and  $n, \pi^*$  states of run 2a.

## Run 2b

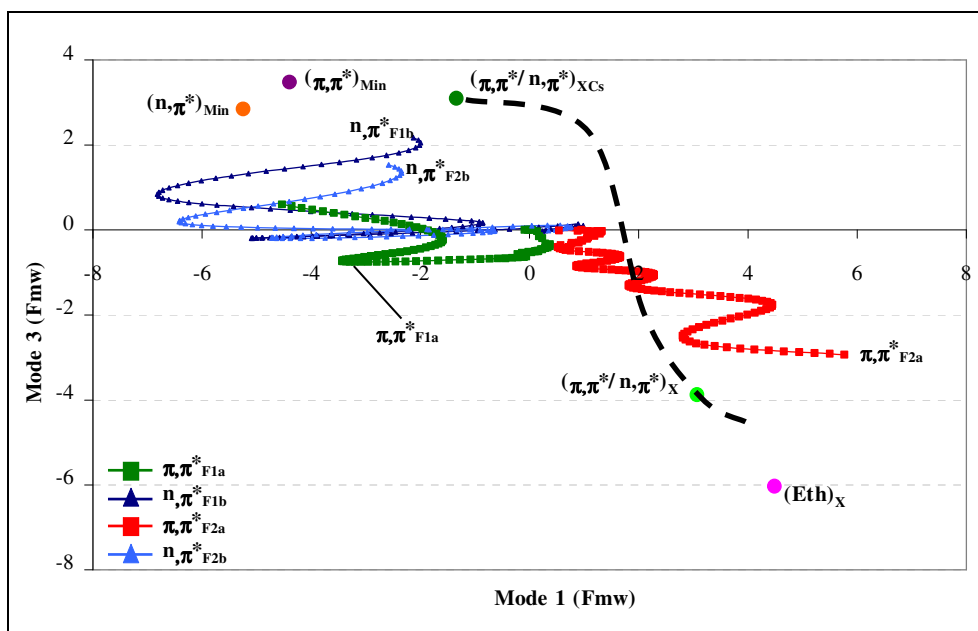

Figure SI-12 Position of the center of the Gaussian functions of run 2b.

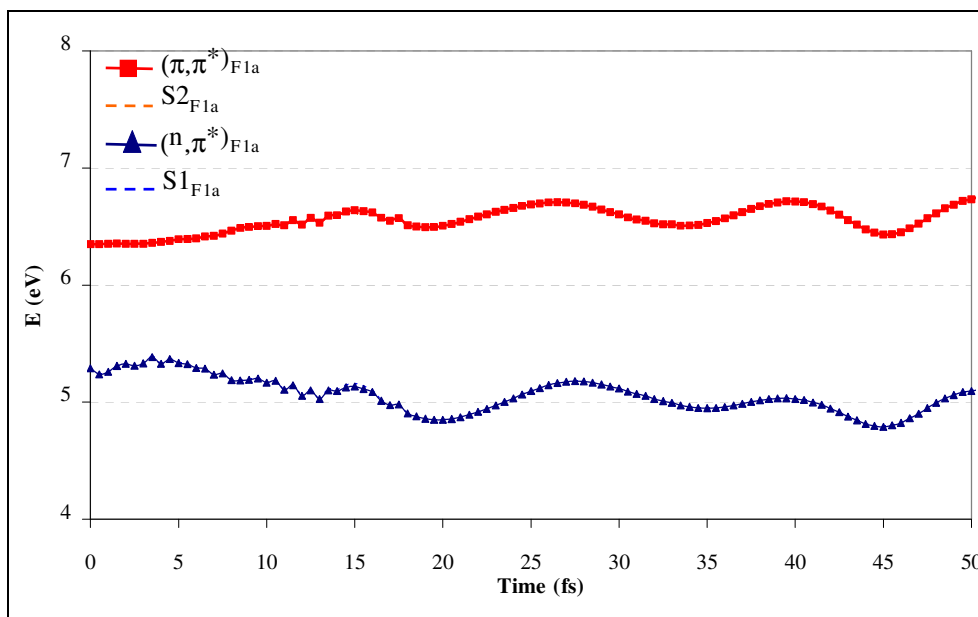

Figure SI-13a. Diabatic and adiabatic energies at the center of function F1a of run 2b.



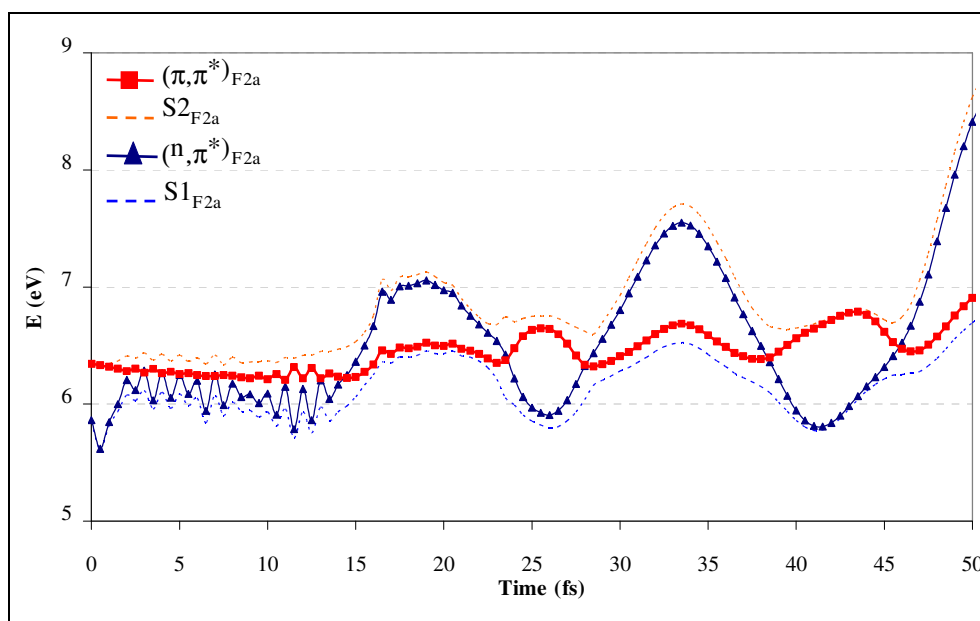

**Figure SI-13b.** Diabatic and adiabatic energies at the center of function F2a of run 2b.

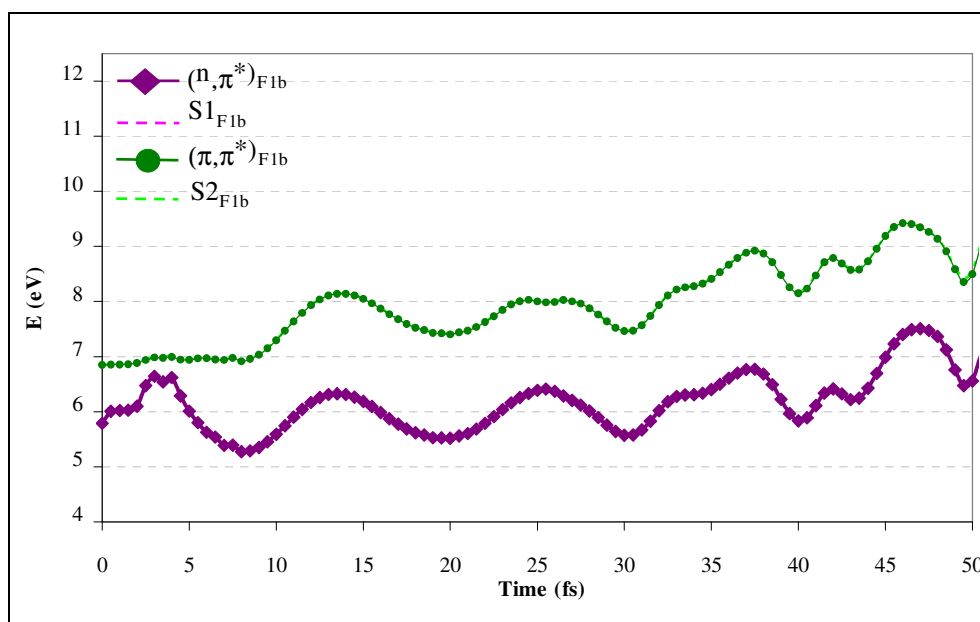

**Figure SI-13c.** Diabatic and adiabatic energies at the center of function F1b of run 2b.

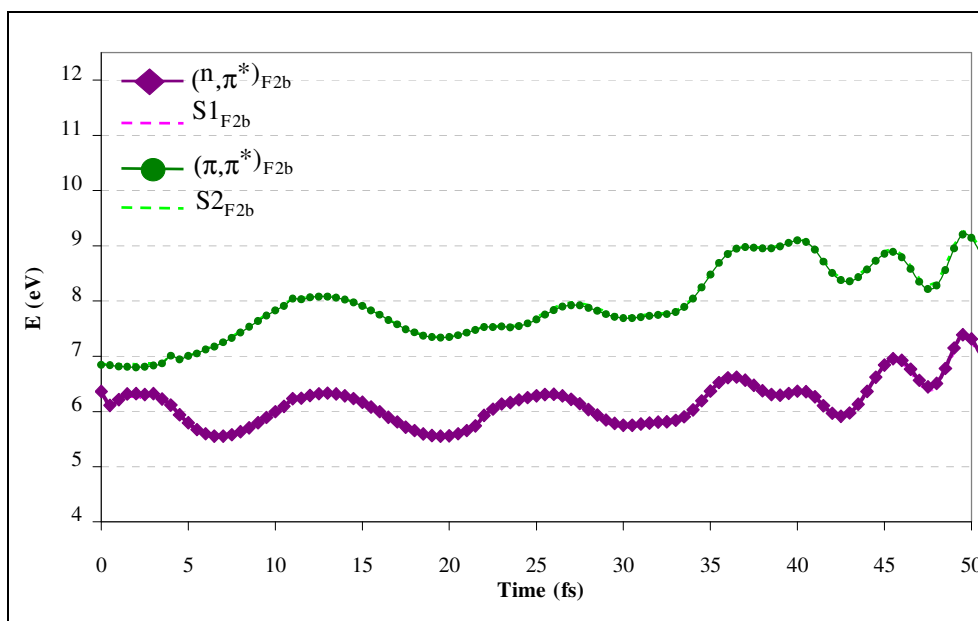

Figure SI-13d. Diabatic and adiabatic energies at the center of function F2b of run 2b.

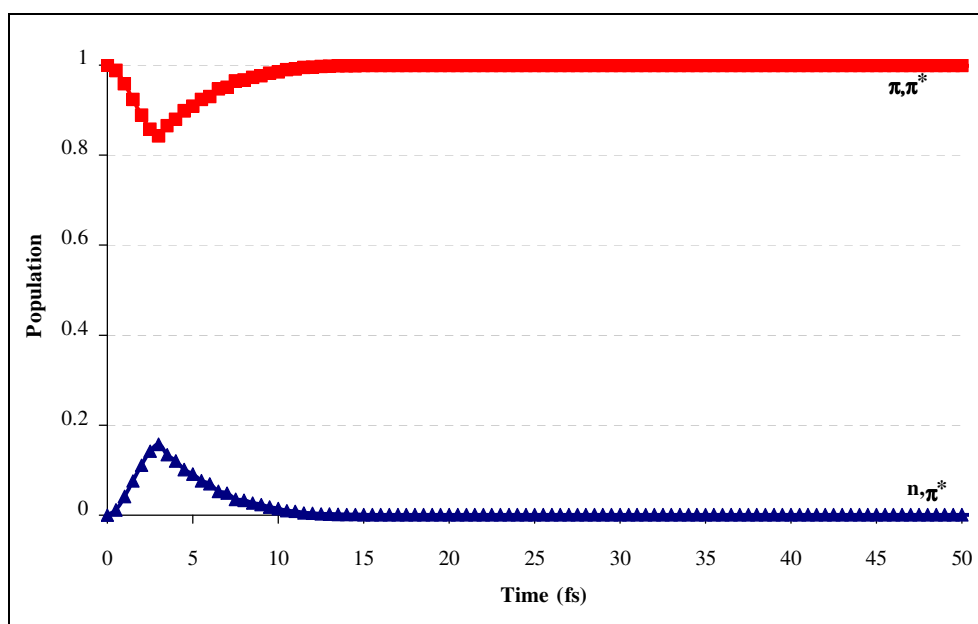

Figure SI-14. Populations of the  $\pi, \pi^*$  and  $n, \pi^*$  states of run 2b.

### Run 3a

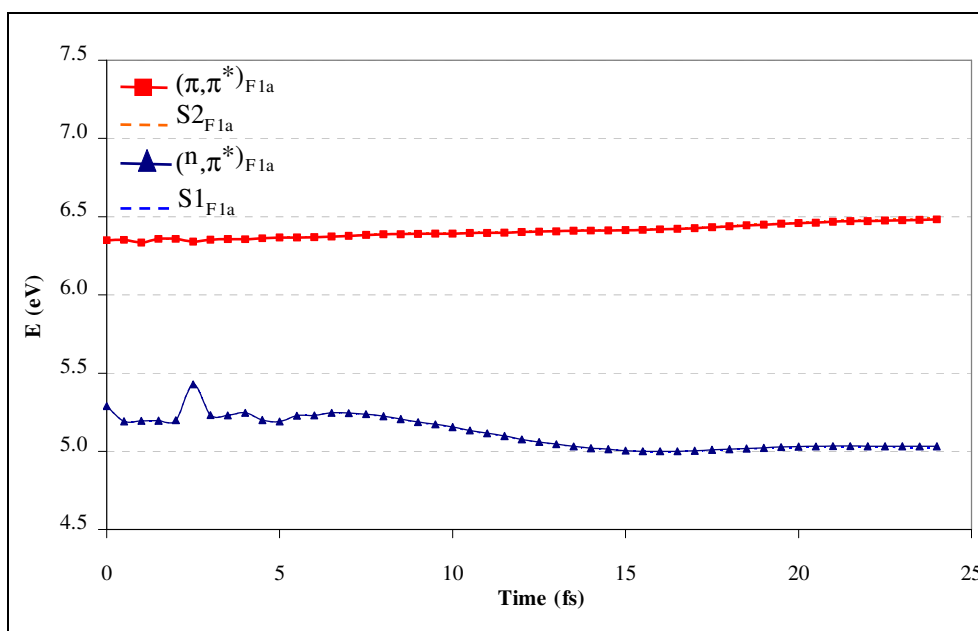

Figure SI-15a. Diabatic and adiabatic energies at the center of function F1a of run 3a.

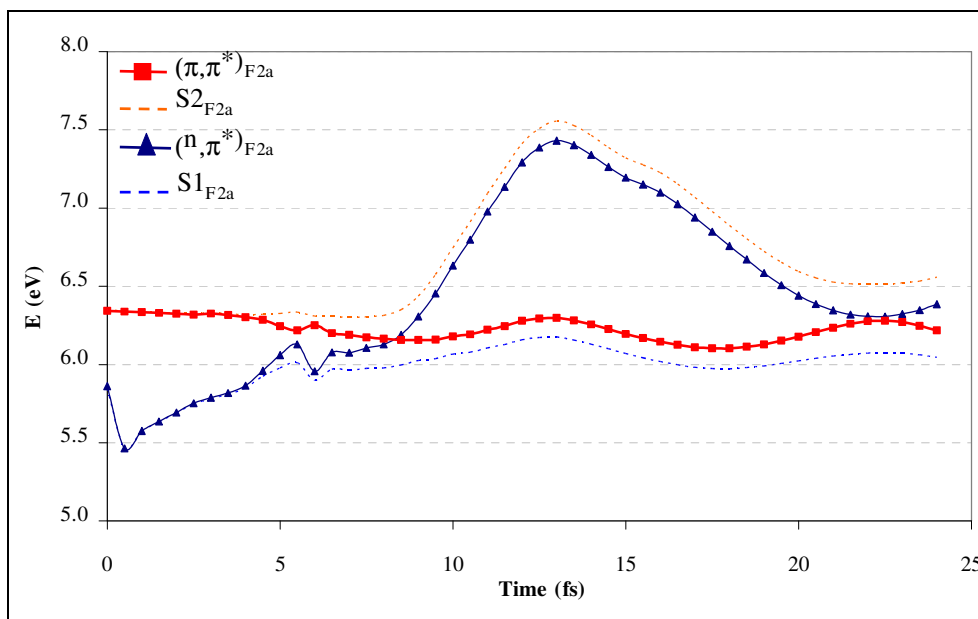

Figure SI-15b. Diabatic and adiabatic energies at the center of function F2a of run 3a.

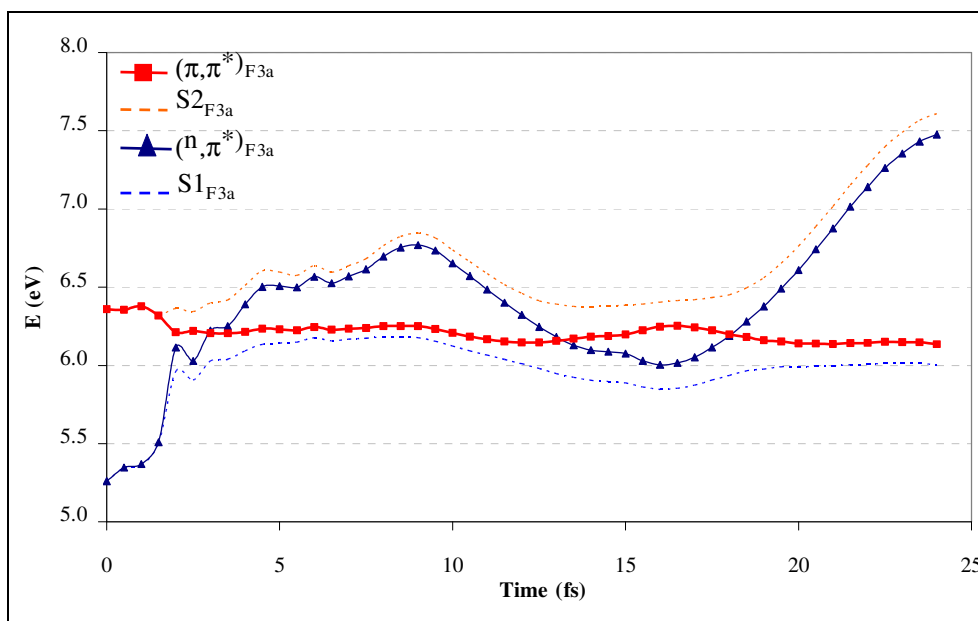

**Figure SI-15c.** Diabatic and adiabatic energies at the center of function F3a of run 3a.

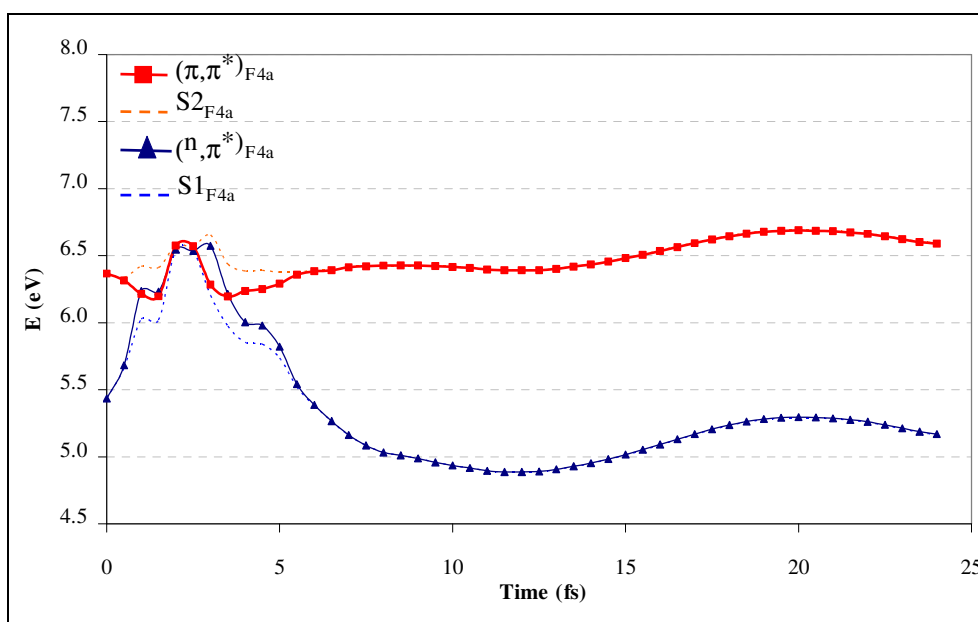

**Figure SI-15d.** Diabatic and adiabatic energies at the center of function F4a of run 3a.

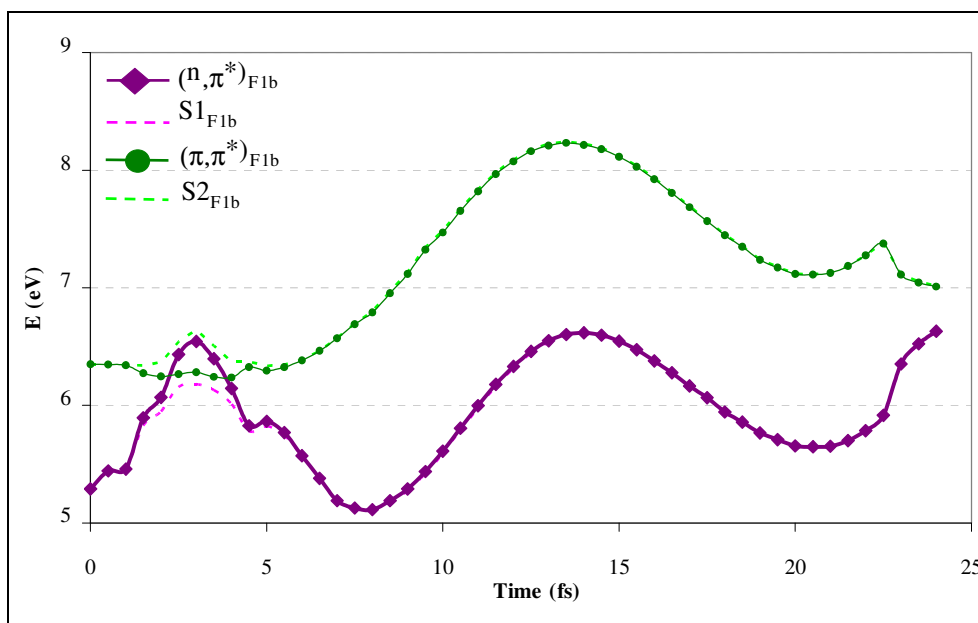

**Figure SI-15e.** Diabatic and adiabatic energies at the center of function F1b of run 3a.

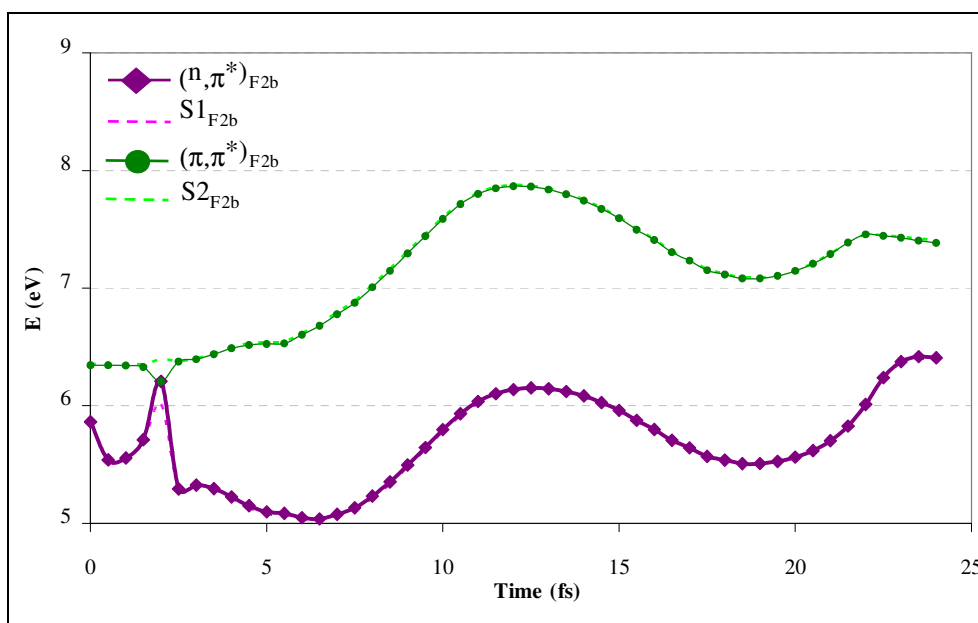

**Figure SI-15f.** Diabatic and adiabatic energies at the center of function F2b of run 3a.

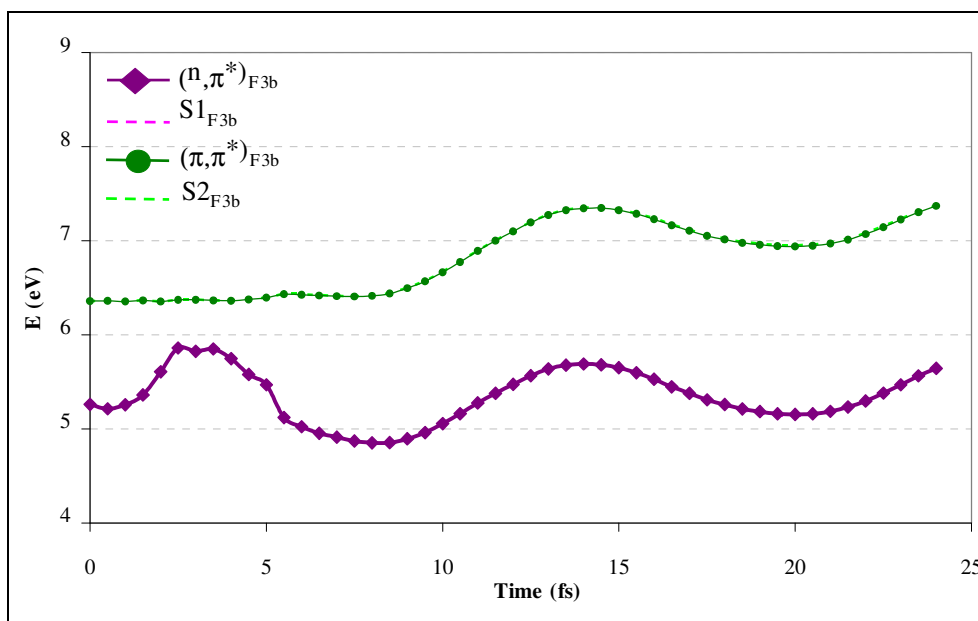

**Figure SI-15g.** Diabatic and adiabatic energies at the center of function F3b of run 3a.

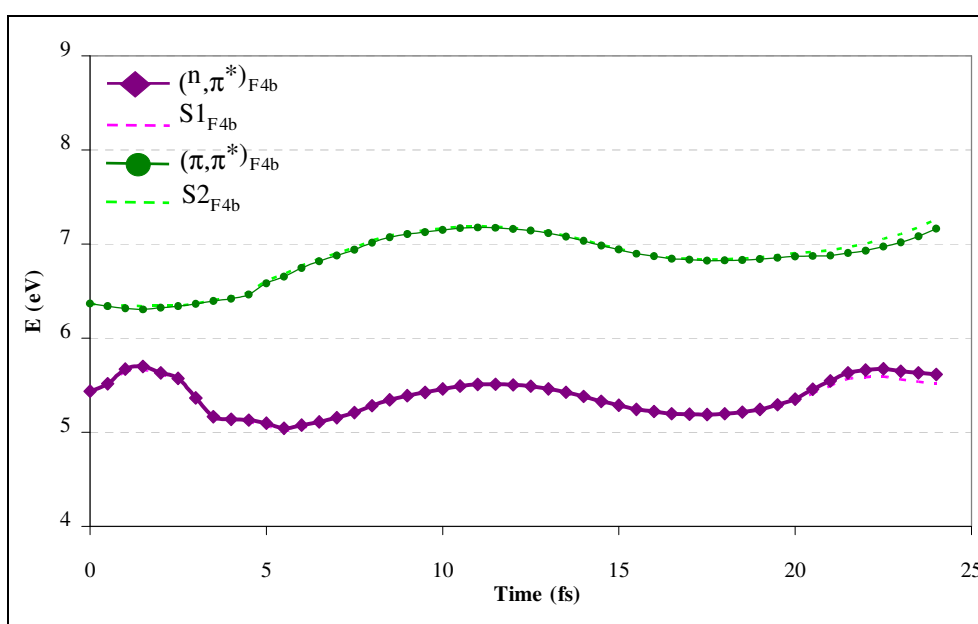

**Figure SI-15h.** Diabatic and adiabatic energies at the center of function F4b of run 3a.

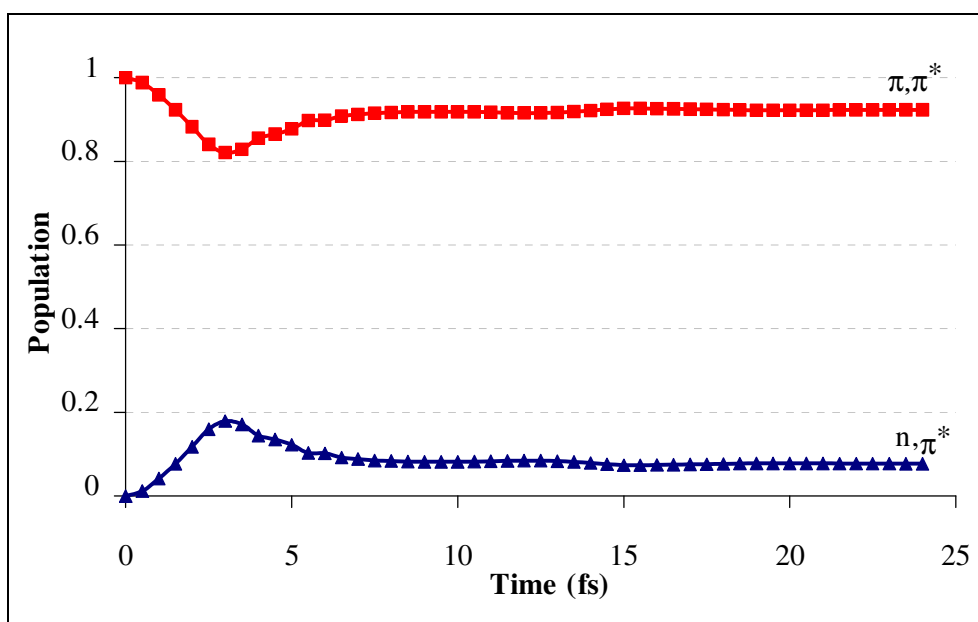

**Figure SI-16.** Populations of the  $\pi, \pi^*$  and  $n, \pi^*$  states of run 3a.

### Run 3b

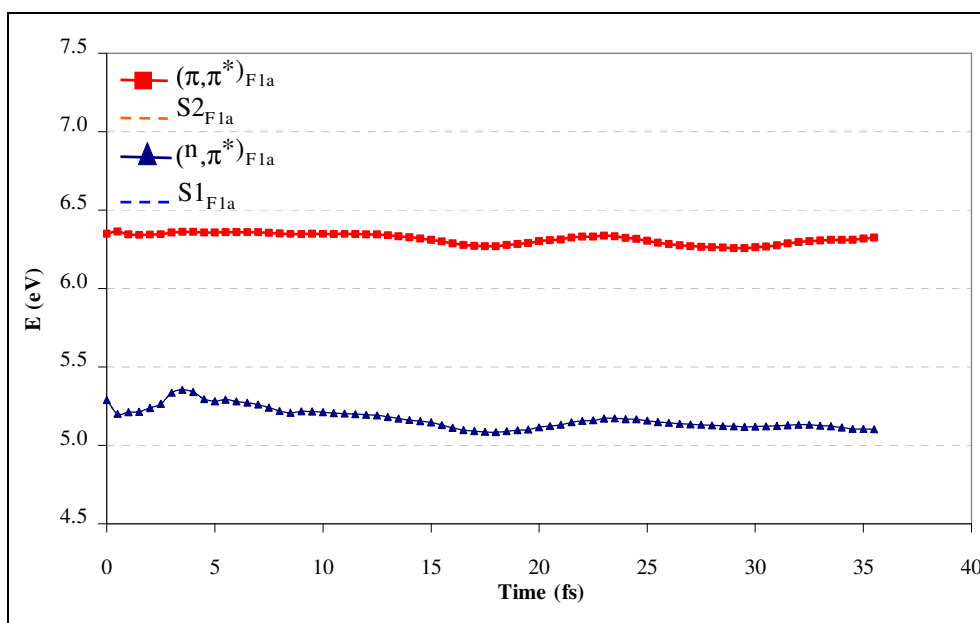

Figure SI-17a. Diabatic and adiabatic energies at the center of function F1a of run 3b.

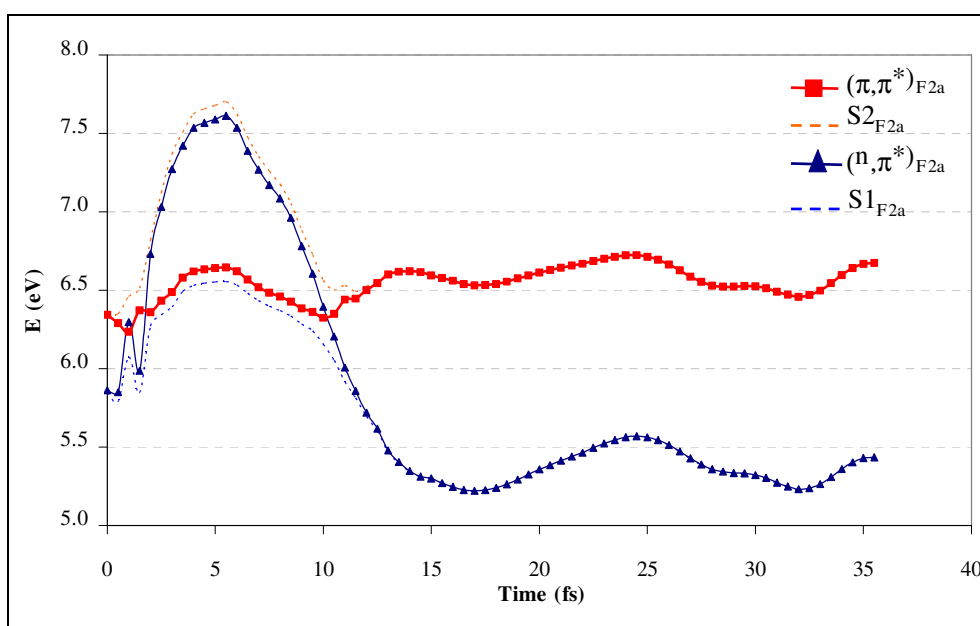

Figure SI-17b. Diabatic and adiabatic energies at the center of function F2a of run 3b.



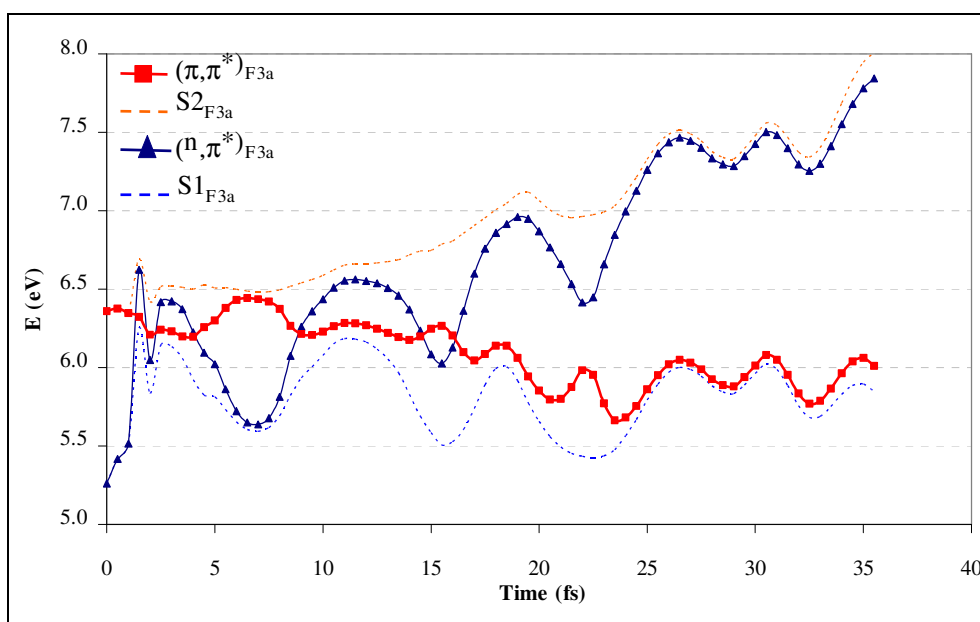

**Figure SI-17c.** Diabatic and adiabatic energies at the center of function F3a of run 3b.

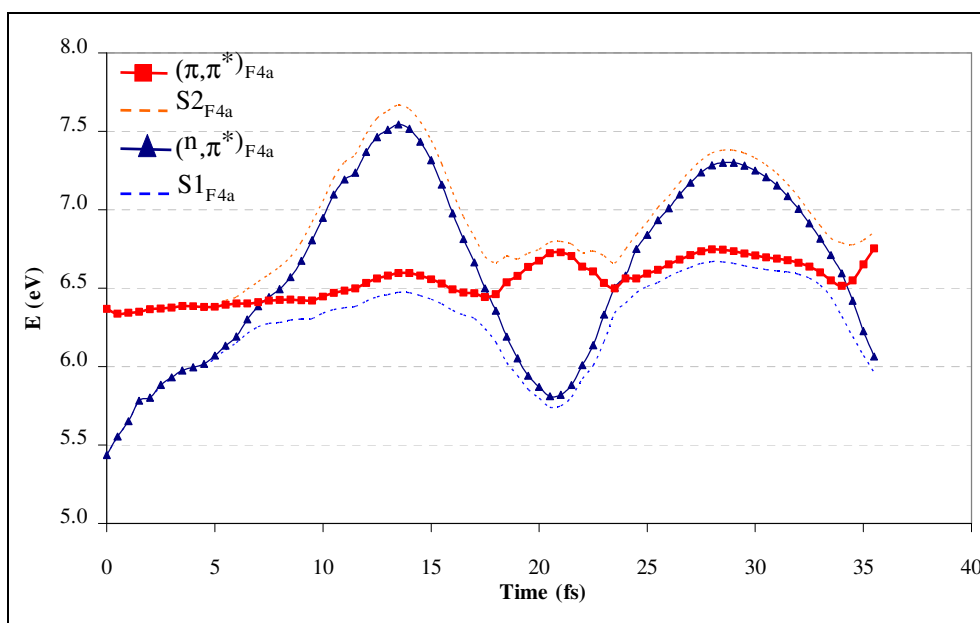

**Figure SI-17d.** Diabatic and adiabatic energies at the center of function F4a of run 3b.

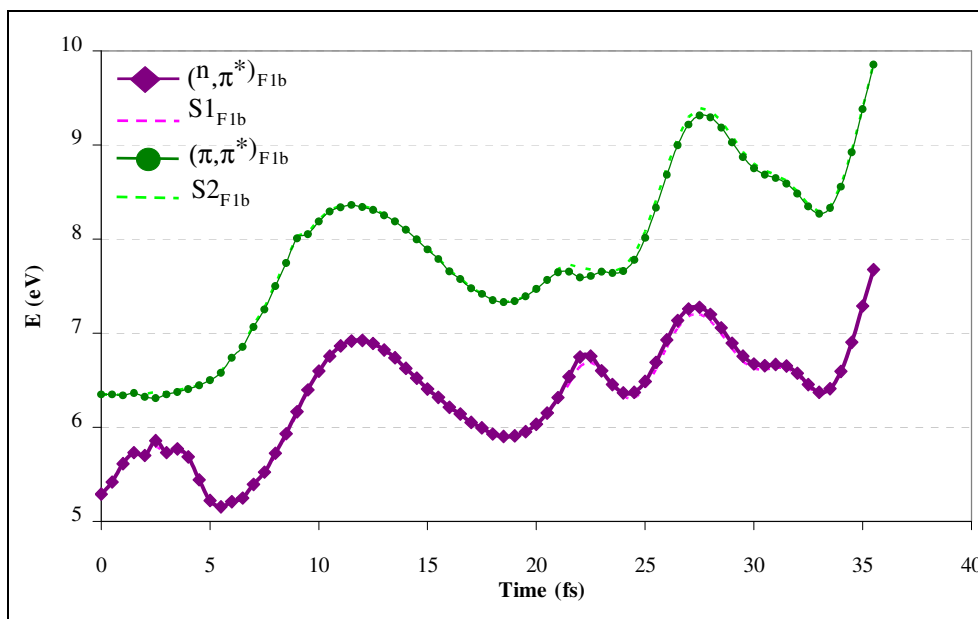

**Figure SI-17e.** Diabatic and adiabatic energies at the center of function F1b of run 3b.

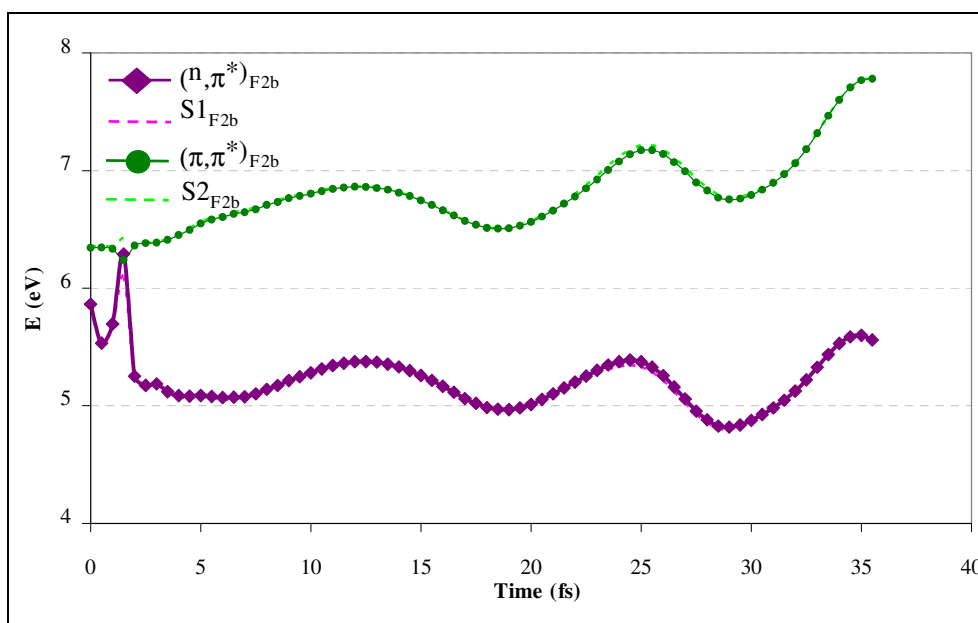

**Figure SI-17f.** Diabatic and adiabatic energies at the center of function F2b of run 3b.

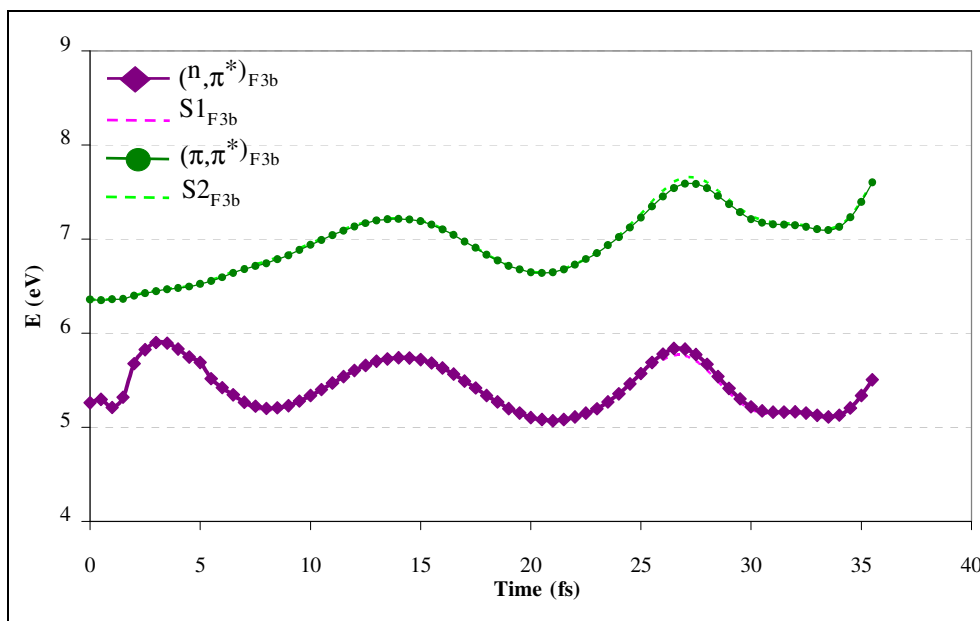

**Figure SI-17g.** Diabatic and adiabatic energies at the center of function F3b of run 3b.

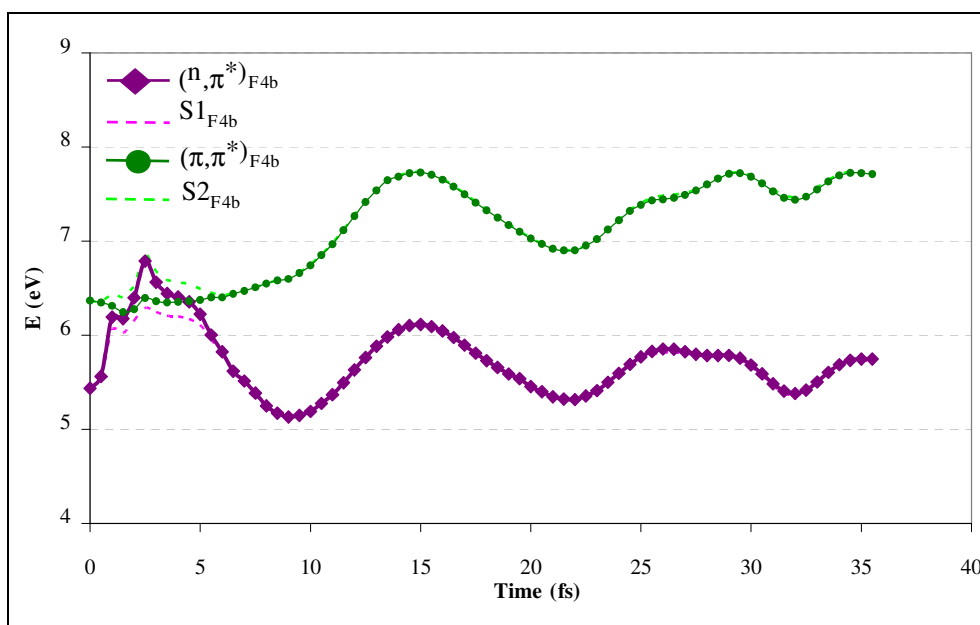

**Figure SI-17h.** Diabatic and adiabatic energies at the center of function F4b of run 3b.

## Cartesian Coordinates of structures

### $(\pi, \pi^*/n, \pi^*)_X\text{-Cs}$

|   |              |              |              |
|---|--------------|--------------|--------------|
| 7 | 0.000000000  | 0.000000000  | 0.000000000  |
| 6 | 0.000000000  | 0.000000000  | 1.302709000  |
| 6 | 0.000000000  | 1.465361900  | 1.937465570  |
| 6 | 0.000000000  | 2.620541940  | 1.110255100  |
| 7 | 0.000000000  | 2.307922600  | -0.348109220 |
| 6 | 0.000000000  | 1.131579260  | -0.928101470 |
| 1 | 0.000000080  | -0.920472000 | 1.844497450  |
| 6 | 0.000000120  | 1.506772450  | 3.409858360  |
| 8 | 0.000000080  | 3.768817100  | 1.394786130  |
| 1 | 0.000000080  | 3.110482740  | -0.940283240 |
| 8 | -0.000000090 | 0.819461510  | -2.077281940 |
| 1 | -0.000000080 | -0.863508190 | -0.513019530 |
| 1 | 0.873205760  | 0.992791980  | 3.830699200  |
| 1 | 0.000000200  | 2.530292160  | 3.752859730  |
| 1 | -0.873205420 | 0.992791920  | 3.830699340  |

### $(\pi, \pi^*/n, \pi^*)_X\text{-PT2-1}$

|   |              |              |              |
|---|--------------|--------------|--------------|
| 7 | 0.000000000  | 0.000000000  | 0.000000000  |
| 6 | 0.000000000  | 0.000000000  | 1.377437000  |
| 6 | 0.000000000  | 1.413634760  | 1.989083600  |
| 6 | -0.001595800 | 2.485760800  | 1.175738810  |
| 7 | -0.002224950 | 2.333692750  | -0.252630070 |
| 6 | -0.001534020 | 1.098659320  | -0.855160710 |
| 1 | 0.001739070  | -0.958137730 | 1.872139080  |
| 6 | 0.000522910  | 1.438897100  | 3.484213100  |
| 8 | -0.003550930 | 3.810128580  | 1.517850830  |
| 1 | -0.003287960 | 3.117075500  | -0.846495390 |
| 8 | -0.001404420 | 0.858871890  | -2.023624320 |
| 1 | 0.001184130  | -0.858859480 | -0.484772780 |
| 1 | 0.872756770  | 0.921328230  | 3.888034570  |
| 1 | -0.000814320 | 2.457628560  | 3.841088460  |
| 1 | -0.871282550 | 0.919536450  | 3.888473460  |

**$(\pi, \pi^*/n, \pi^*)_X$ -PT2-2**

|   |              |              |              |
|---|--------------|--------------|--------------|
| 7 | 0.000000000  | 0.000000000  | 0.000000000  |
| 6 | 0.000000000  | 0.000000000  | 1.359190000  |
| 6 | 0.000000000  | 1.349341880  | 2.002504090  |
| 6 | -0.431260620 | 2.364136720  | 1.226471580  |
| 7 | -0.519532700 | 2.226813990  | -0.144503450 |
| 6 | -0.183869460 | 1.084568720  | -0.827438790 |
| 1 | -0.415441340 | -0.877247430 | 1.825830010  |
| 6 | 0.361833280  | 1.456808140  | 3.448553170  |
| 8 | -0.694023590 | 3.622875530  | 1.595869910  |
| 1 | -0.774084150 | 3.026617120  | -0.681394270 |
| 8 | -0.113589100 | 0.994005340  | -2.018635600 |
| 1 | 0.033535920  | -0.868226200 | -0.491204830 |
| 1 | 1.343834860  | 1.028307800  | 3.625912570  |
| 1 | 0.384708230  | 2.488853970  | 3.764237830  |
| 1 | -0.338065860 | 0.930825910  | 4.094097480  |
